# Supplementary material for: Allogeneic hematopoietic stem cell transplantation in patients aged 60-79 years in Germany (1998-2018): a registry study
Source: PubMed Central journal article supplement — Haematologica. 2023 Aug 31;109(2):431–43. doi: 10.3324/haematol.2023.283175 (PMC10831926; doi:10.3324/haematol.2023.283175), 2023-08-31

# Allogeneic hematopoietic stem cell transplantation in patients aged 60-79 years in Germany (1998-2018): a registry study

Jan Frederic Weller,<sup>1</sup> Claudia Lengerke,<sup>1</sup> Jürgen Finke,<sup>2</sup> Johannes Schetelig,<sup>3</sup> Uwe Platzbecker,<sup>4</sup> Hermann Einsele,<sup>5</sup> Thomas Schroeder,<sup>6</sup> Christoph Faul,<sup>1</sup> Matthias Stelljes,<sup>7</sup> Peter Dreger,<sup>8</sup> Igor W. Blau,<sup>9</sup> Gerald Wulf,<sup>10</sup> Johanna Tischer,<sup>11</sup> Christoph Scheid,<sup>12</sup> Ahmet Elmaagacli,<sup>13</sup> Helga Neidlinger,<sup>14</sup> Sarah Flossdorf,<sup>14,15</sup> Martin Bornhäuser,<sup>3</sup> Wolfgang Bethge,<sup>1</sup> Katharina Fleischhauer,<sup>14,16</sup> Nicolaus Kröger,<sup>14,17</sup> Liesbeth C. de Wreede<sup>18,19</sup> and Maximilian Christopeit,<sup>1</sup> for Deutsches Register für Stammzelltransplantationen DRST/German Registry for Stem Cell Transplantation and the Cooperative Group for Stem Cell Transplantation of the German Working Group for Transplantation and Cellular Therapy (DAG-HSZT)

<sup>1</sup>Department of Internal Medicine II, Hematology, Oncology, Clinical Immunology and Rheumatology, University Hospital Tübingen, Tübingen, Germany; <sup>2</sup>University Medical Center Freiburg, Department of Hematology, Oncology and Stem Cell Transplantation, Faculty of Medicine, University of Freiburg, Freiburg, Germany; <sup>3</sup>Department of Internal Medicine I, University Hospital Carl Gustav Carus, TU Dresden, Dresden, Germany; <sup>4</sup>Medical Clinic and Policlinic I, Hematology and Cellular Therapy, Leipzig University Hospital, Leipzig, Germany; <sup>5</sup>Department of Internal Medicine II, University Hospital of Würzburg, Würzburg, Germany; <sup>6</sup>Department of Hematology and Stem Cell Transplantation, West German Cancer Center Essen, University Hospital Essen, Essen, Germany; <sup>7</sup>Department of Medicine A, University Hospital of Münster, Münster, Germany; <sup>8</sup>Department of Medicine V, University of Heidelberg, Heidelberg, Germany; <sup>9</sup>Medical Clinic, Charité University Medicine Berlin, Berlin, Germany; <sup>10</sup>Hematology and Medical Oncology, University Medicine Göttingen, Göttingen, Germany; <sup>11</sup>Internal Medicine III, Hematology/Oncology/Stem Cell Transplantation, Ludwig-Maximilians-University, Munich, Germany; <sup>12</sup>Faculty of Medicine and Cologne University Hospital, Center for Integrated Oncology Aachen-Bonn-Cologne-Düsseldorf (CIO ABCD), University of Cologne, Cologne, Germany; <sup>13</sup>Department of Hematology/Oncology and Stem Cell Transplantation, Asklepios Klinik St. Georg, Hamburg, Germany; <sup>14</sup>German Registry for Stem Cell Transplantation, DRST, Ulm, Germany; <sup>15</sup>Institute for Medical Informatics, Biometry and Epidemiology (IMIBE), University of Duisburg-Essen, Essen, Germany; <sup>16</sup>Institute for Experimental Cellular Therapy, University Hospital Essen, Essen, Germany; <sup>17</sup>Department of Stem Cell Transplantation, University Medical Center Eppendorf, Hamburg, Germany; <sup>18</sup>Department of Biomedical Data Sciences, Leiden University Medical Center, Leiden, The Netherlands and <sup>19</sup>DKMS Clinical Trials Unit, Dresden, Germany

**Correspondence:** M. Christopeit  
[m.christopeit@uke.de](mailto:m.christopeit@uke.de)

**Received:** March 20, 2023.

**Accepted:** August 11, 2023.

**Early view:** August 31, 2023.

<https://doi.org/10.3324/haematol.2023.283175>

©2024 Ferrata Storti Foundation

Published under a CC BY-NC license

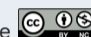

# APPENDIX

## Content

|                                                                                                                                                     |           |
|-----------------------------------------------------------------------------------------------------------------------------------------------------|-----------|
| Supplemental figure 1 – Consort diagram. Dataset structure.....                                                                                     | 3         |
| Supplemental table 1 – Conditioning Regimen and TCI.....                                                                                            | 4         |
| Supplemental table 2 – Demographic and Clinical Characteristics of the Patients at transplantation. Values per decade of transplant.....            | 11        |
| <b>1. Multistate and Relative Survival.....</b>                                                                                                     | <b>12</b> |
| <b>Multistate – Schematic Representation.....</b>                                                                                                   | <b>12</b> |
| Supplemental figure 2.1 Schematic representation of multistate models with different split-states. ....                                             | 12        |
| Supplemental figure 2.2 Schematic representation of multistate models with different split-states. ....                                             | 13        |
| <b>Sup 1: Additive Model – reference.....</b>                                                                                                       | <b>14</b> |
| Supplemental figure 3 Competing risks of population mortality and disease-specific mortality without multistate integration.....                    | 15        |
| <b>Excess mortality hazard .....</b>                                                                                                                | <b>16</b> |
| Supplemental figure 4.1. Excess mortality hazard in comparison to German general population (age-, sex- and year-matched). ....                     | 16        |
| Supplemental figure 4.2. mortality lambda in comparison to German general population (age-, sex- and year-matched) after one year of survival. .... | 17        |
| <b>Multistate Estimations in RFS- and GRFS-environments.....</b>                                                                                    | <b>18</b> |
| Supplemental figure 5.1 Multistate estimations of relapse-free survival and mortality after alloHSCT for all patients aged 70-79.....               | 18        |
| Supplemental figure 5.2. Multistate Estimations of relapse-free survival and mortality after alloHSCT for all patients 60-69. ....                  | 19        |
| Supplemental figure 5.3. Multistate Estimations of GvH-relapse-free survival and mortality after alloHSCT for all patients 70-79. ....              | 20        |
| Supplemental figure 5.4. Multistate Estimations of GvH-relapse-free survival and mortality after alloHSCT for all patients 60-69. ....              | 21        |
| <b>Outcomes from RFS-multistate.....</b>                                                                                                            | <b>22</b> |
| Supplemental table 3.1. Multistate estimations, patients divided by age group. ....                                                                 | 22        |
| Supplemental table 3.2. Multistate estimations after one year EF-survival, patients divided by age group. All estimations in % [SE] [95CI]. ....    | 22        |
| <b>Outcomes from GRFS-multistate.....</b>                                                                                                           | <b>24</b> |
| Supplemental table 3.3. Multistate estimations, patients divided by age group. ....                                                                 | 24        |
| Supplemental table 3.4. Multistate estimations after one year of GRF-survival, patients divided by age group. ....                                  | 25        |

|           |                                                                                                                                     |           |
|-----------|-------------------------------------------------------------------------------------------------------------------------------------|-----------|
| <b>2.</b> | <b><i>Completeness of Follow-up</i></b> .....                                                                                       | <b>27</b> |
| <b>3.</b> | <b><i>Approach to missingness</i></b> .....                                                                                         | <b>28</b> |
|           | Supplemental table 4. Hazard ratios, derived from complete case analysis before imputation (n = 1453).....                          | 34        |
| <b>4.</b> | <b><i>Additional data</i></b> .....                                                                                                 | <b>34</b> |
|           | Supplemental figure 6.....                                                                                                          | 35        |
|           | Supplemental figure 7.1 – Schoenfeld residuals for follow-up > 50% .....                                                            | 36        |
|           | Supplemental figure 7.2 – Schoenfeld residuals for follow-up > 80% .....                                                            | 37        |
|           | <b>Supplemental table 5. Regression analyses – full model</b> .....                                                                 | 42        |
| <b>5.</b> | <b><i>Addressing possible bias throughout the manuscript – patients transplanted after 2005</i></b>                                 | <b>42</b> |
|           | Supplemental table 6 - Detailed outcome data – patients transplanted after 2005 and with a center-follow up of 50%, n = 7739.....   | 42        |
|           | Supplemental table 7. Regression analyses – all patients transplanted after 2005 and with a center-follow up of 50%, n = 7739 ..... | 44        |
|           | Supplemental figure 8.1 – Multistates for all patients 60-69 transplanted after 2005, with a center follow-up of 50%, n = 7739..... | 48        |
|           | Supplemental figure 8.2 – Multistates for all patients 70-79 transplanted after 2005, with a center follow-up of 50%, n = 7739..... | 49        |

Supplemental figure 1 – Consort diagram. Dataset structure.

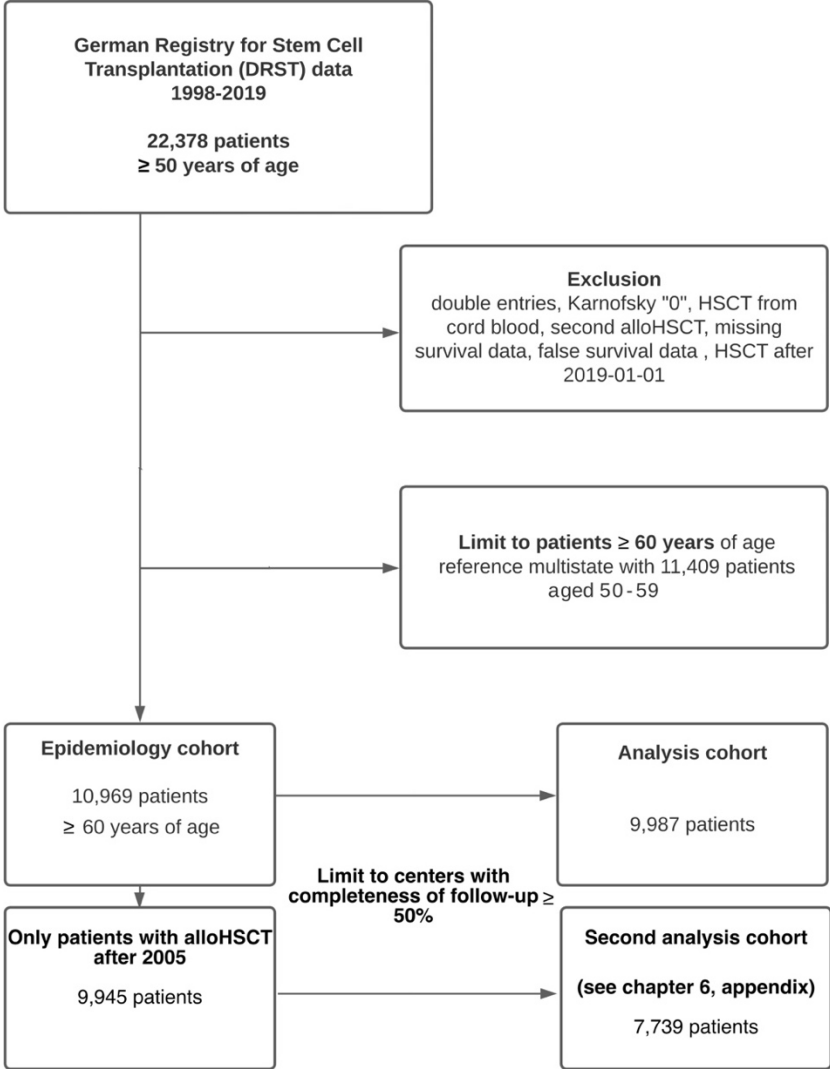

**Supplemental table 1 – Conditioning Regimen and TCI**

*Bu* Busulfane, *Cy* Cyclophosphamide, *Flu* Fludarabine, *Mel* Melphalane, *TT* Thiotepa, *TBu(3/2)F* = Busulfan 3/2 days, Thiotepa 5 mg/kg, *Treo* Treosulfane

| <b>Conditioning regimen &amp; TCI values</b> |          |                         |                         |
|----------------------------------------------|----------|-------------------------|-------------------------|
| <b>Variable</b>                              | <b>N</b> | <b>60-69, N = 9,422</b> | <b>70-79, N = 1,547</b> |
| Conditioning regimen                         | 10,969   |                         |                         |
| Bu(dose missing)Flu                          |          | 648 (6.9%)              | 135 (8.7%)              |
| Bu/Cy                                        |          | 139 (1.5%)              | 10 (0.6%)               |
| Bu2Flu                                       |          | 1,310 (14%)             | 295 (19%)               |
| Bu3Flu                                       |          | 185 (2.0%)              | 15 (1.0%)               |
| Bu4Flu                                       |          | 23 (0.2%)               | 1 (<0.1%)               |
| FBM (Flu/BCNU/Mel)                           |          | 1,104 (12%)             | 212 (14%)               |
| FLAMSA+other                                 |          | 1,155 (12%)             | 193 (12%)               |
| Flu+Others                                   |          | 95 (1.0%)               | 6 (0.4%)                |
| FluCy                                        |          | 275 (2.9%)              | 37 (2.4%)               |

| <b>Conditioning regimen &amp; TCI values</b>       |          |                         |                         |
|----------------------------------------------------|----------|-------------------------|-------------------------|
| <b>Variable</b>                                    | <b>N</b> | <b>60-69, N = 9,422</b> | <b>70-79, N = 1,547</b> |
| FluMel(dose missing)                               |          | 337 (3.6%)              | 37 (2.4%)               |
| FluMel110                                          |          | 27 (0.3%)               | 8 (0.5%)                |
| FluMel140                                          |          | 354 (3.8%)              | 42 (2.7%)               |
| FluTBI2Gy                                          |          | 1,087 (12%)             | 233 (15%)               |
| FluTT                                              |          | 260 (2.8%)              | 44 (2.8%)               |
| Others/not fully reported                          |          | 986 (10%)               | 56 (3.6%)               |
| TBI(dose missing)/Cy                               |          | 47 (0.5%)               | 6 (0.4%)                |
| TBI12/Cy                                           |          | 27 (0.3%)               | 0 (0%)                  |
| TBI12/VP16/CY                                      |          | 1 (<0.1%)               | 0 (0%)                  |
| TBI8/Cy                                            |          | 14 (0.1%)               | 0 (0%)                  |
| TBU2Flu                                            |          | 40 (0.4%)               | 10 (0.6%)               |
| TBU3Flu                                            |          | 15 (0.2%)               | 0 (0%)                  |
| Treo36Flu                                          |          | 1,293 (14%)             | 207 (13%)               |
| Total conditioning intensity - values <sup>+</sup> | 8,616    |                         |                         |

| <b>Conditioning regimen &amp; TCI values</b> |          |                         |                         |
|----------------------------------------------|----------|-------------------------|-------------------------|
| <b>Variable</b>                              | <b>N</b> | <b>60-69, N = 9,422</b> | <b>70-79, N = 1,547</b> |
| 1                                            |          | 275 (3.8%)              | 37 (2.8%)               |
| 1.5                                          |          | 2,684 (37%)             | 580 (44%)               |
| 2                                            |          | 40 (0.5%)               | 10 (0.8%)               |
| 2.5                                          |          | 1,832 (25%)             | 264 (20%)               |
| 3                                            |          | 2,288 (31%)             | 405 (31%)               |
| 3.5                                          |          | 23 (0.3%)               | 1 (<0.1%)               |
| 4                                            |          | 166 (2.3%)              | 10 (0.8%)               |
| 4.5                                          |          | 1 (<0.1%)               | 0 (0%)                  |
| Unknown                                      |          | 2,113                   | 240                     |

| DRST Data          |                 |                                      |                                      |                          |                 |                                    |                                      |                          |
|--------------------|-----------------|--------------------------------------|--------------------------------------|--------------------------|-----------------|------------------------------------|--------------------------------------|--------------------------|
| Characteristic     | 60-69, N = 9422 |                                      |                                      |                          | 70-79, N = 1547 |                                    |                                      |                          |
|                    | N               | 1998-2008, N =<br>2,217 <sup>1</sup> | 2009-2018, N =<br>7,205 <sup>1</sup> | p-<br>value <sup>2</sup> | N               | 1998-2008, N =<br>112 <sup>1</sup> | 2009-2018, N =<br>1,435 <sup>1</sup> | p-<br>value <sup>2</sup> |
| <b>Patient Sex</b> | 9,420           |                                      |                                      | 0.8                      | 1,545           |                                    |                                      | 0.6                      |
| female             |                 | 881 (40%)                            | 2,839 (39%)                          |                          |                 | 37 (33%)                           | 508 (35%)                            |                          |
| male               |                 | 1,336 (60%)                          | 4,364 (61%)                          |                          |                 | 75 (67%)                           | 925 (65%)                            |                          |
| <b>Patient Age</b> | 9,422           | 63.69 (61.79,<br>65.81)              | 64.37 (62.24,<br>66.90)              | <0.001                   | 1,547           | 71.25 (70.50,<br>73.11)            | 72.09 (70.91,<br>73.64)              | 0.001                    |
| <b>Diagnosis</b>   | 9,422           |                                      |                                      | <0.001                   | 1,547           |                                    |                                      | 0.3                      |
| Acute leukemia     |                 | 1,197 (54%)                          | 3,789 (53%)                          |                          |                 | 80 (71%)                           | 934 (65%)                            |                          |
| CLL                |                 | 115 (5.2%)                           | 240 (3.3%)                           |                          |                 | 0 (0%)                             | 37 (2.6%)                            |                          |
| CML                |                 | 99 (4.5%)                            | 76 (1.1%)                            |                          |                 | 2 (1.8%)                           | 10 (0.7%)                            |                          |



|                                |       |             |             |        |          |             |             |       |
|--------------------------------|-------|-------------|-------------|--------|----------|-------------|-------------|-------|
| Lymphoma                       |       | 141 (6.4%)  | 646 (9.0%)  |        | 3 (2.7%) | 60 (4.2%)   |             |       |
| MDS/MPN                        |       | 431 (19%)   | 1,867 (26%) |        | 25 (22%) | 343 (24%)   |             |       |
| Others                         |       | 77 (3.5%)   | 213 (3.0%)  |        | 2 (1.8%) | 37 (2.6%)   |             |       |
| Plasma cell disorders          |       | 157 (7.1%)  | 374 (5.2%)  |        | 0 (0%)   | 14 (1.0%)   |             |       |
| <b>Donor/Patient HLA-match</b> | 4,043 |             |             | 0.9    | 516      | 0.5         |             |       |
| match                          |       | 1,327 (86%) | 2,150 (86%) |        | 59 (88%) | 382 (85%)   |             |       |
| mismatch                       |       | 214 (14%)   | 352 (14%)   |        | 8 (12%)  | 67 (15%)    |             |       |
| <b>Donor/Patient Relation</b>  | 9,407 |             |             | <0.001 | 1,545    | <0.001      |             |       |
| Family                         |       | 739 (33%)   | 1,578 (22%) |        | 30 (27%) | 190 (13%)   |             |       |
| Unrelated                      |       | 1,472 (67%) | 5,618 (78%) |        | 82 (73%) | 1,243 (87%) |             |       |
| <b>Donor Age</b>               | 4,310 | 42 (32, 58) | 36 (27, 49) | <0.001 | 790      | 40 (31, 65) | 34 (27, 44) | 0.001 |
| <b>Stem cell source</b>        | 9,409 |             |             | >0.9   | 1,541    |             | 0.014       |       |

|                                    |       |             |             |            |             |        |
|------------------------------------|-------|-------------|-------------|------------|-------------|--------|
| Bone marrow                        |       | 119 (5.4%)  | 383 (5.3%)  | 0 (0%)     | 74 (5.2%)   |        |
| PBSC                               |       | 2,095 (95%) | 6,812 (95%) | 112 (100%) | 1,355 (95%) |        |
| <b>GvHD-Prophylaxis</b>            | 8,655 |             |             | <0.001     | 1,517       | <0.001 |
| CNI+MMF                            |       | 701 (46%)   | 4,337 (61%) | 46 (49%)   | 948 (67%)   |        |
| CsA+MTX                            |       | 389 (25%)   | 1,878 (26%) | 10 (11%)   | 266 (19%)   |        |
| Other                              |       | 442 (29%)   | 908 (13%)   | 37 (40%)   | 210 (15%)   |        |
| <b>TCI - Category</b>              | 7,309 |             |             | 0.002      | 1,307       | 0.005  |
| high                               |       | 41 (3.3%)   | 126 (2.1%)  | 1 (1.2%)   | 9 (0.7%)    |        |
| int                                |       | 654 (53%)   | 3,489 (57%) | 56 (67%)   | 614 (50%)   |        |
| low                                |       | 532 (43%)   | 2,467 (41%) | 26 (31%)   | 601 (49%)   |        |
| <b>Karnofsky Performance Index</b> | 7,970 |             |             | 0.002      | 1,415       | 0.041  |
| < 80                               |       | 127 (11%)   | 535 (7.9%)  | 13 (17%)   | 122 (9.1%)  |        |

|                                         |       |           |             |        |          |            |                 |
|-----------------------------------------|-------|-----------|-------------|--------|----------|------------|-----------------|
| 80                                      |       | 334 (28%) | 1,814 (27%) |        | 27 (35%) | 410 (31%)  |                 |
| 90-100                                  |       | 727 (61%) | 4,433 (65%) |        | 38 (49%) | 805 (60%)  |                 |
| <b>Relevant Comorbidities</b>           | 4,897 | 301 (62%) | 2,804 (64%) | 0.6    | 980      | 35 (78%)   | 645 (69%) 0.2   |
| <b>CMV relation</b>                     | 8,483 |           |             | <0.001 | 1,494    |            | 0.015           |
| Both negative                           |       | 375 (26%) | 1,862 (26%) |        | 25 (27%) | 385 (27%)  |                 |
| Both positive                           |       | 549 (38%) | 3,042 (43%) |        | 28 (30%) | 615 (44%)  |                 |
| Negative Patient, positive Donor        |       | 156 (11%) | 581 (8.2%)  |        | 12 (13%) | 104 (7.4%) |                 |
| Positive Patient, negative Donor        |       | 350 (24%) | 1,568 (22%) |        | 28 (30%) | 297 (21%)  |                 |
| <b>Disease status at HSCT - only CR</b> | 8,954 | 644 (31%) | 2,534 (37%) | <0.001 | 1,489    | 32 (29%)   | 528 (38%) 0.040 |
| <b>Disease status at HSCT</b>           | 8,954 |           |             | <0.001 | 1,489    |            | <0.001          |
| 1st CR                                  |       | 463 (22%) | 2,018 (29%) |        | 25 (22%) | 386 (28%)  |                 |

|                                                                                      |  |            |             |           |            |
|--------------------------------------------------------------------------------------|--|------------|-------------|-----------|------------|
| Any other CR                                                                         |  | 181 (8.6%) | 516 (7.5%)  | 7 (6.2%)  | 142 (10%)  |
| Any partial Remission                                                                |  | 249 (12%)  | 1,041 (15%) | 2 (1.8%)  | 170 (12%)  |
| Any R/R                                                                              |  | 609 (29%)  | 1,701 (25%) | 53 (47%)  | 403 (29%)  |
| Other                                                                                |  | 351 (17%)  | 926 (14%)   | 11 (9.8%) | 173 (13%)  |
| Untreated                                                                            |  | 255 (12%)  | 644 (9.4%)  | 14 (12%)  | 103 (7.5%) |
| Unknown                                                                              |  | 109        | 359         | 0         | 58         |
| <sup>1</sup> n (%); Median (IQR)                                                     |  |            |             |           |            |
| <sup>2</sup> Pearson's Chi-squared test; Wilcoxon rank sum test; Fisher's exact test |  |            |             |           |            |

**Supplemental table 2 – Demographic and Clinical Characteristics of the Patients at transplantation.** Values per decade of transplant. IQR denotes interquartile range, HLA *human leukocyte antigen system*, PBSC *peripheral blood stem cell*, MAC *myeloablative conditioning*, RIC *reduced-intensity conditioning*, CsA *Ciclosporin A*, MMF *Mycophenolate mofetil*, Tac *Tacrolimus*, TBI *total body irradiation*, CMV *cytomegaly virus*

# 1. Multistate and Relative Survival

## Multistate – Schematic Representation

Supplemental figure 2.1 Schematic representation of multistate models with different split-states.

Colors of different states fit to final figure color in RFS environment. Comparison to a German population to divide death events into population (.pop) or excess events.

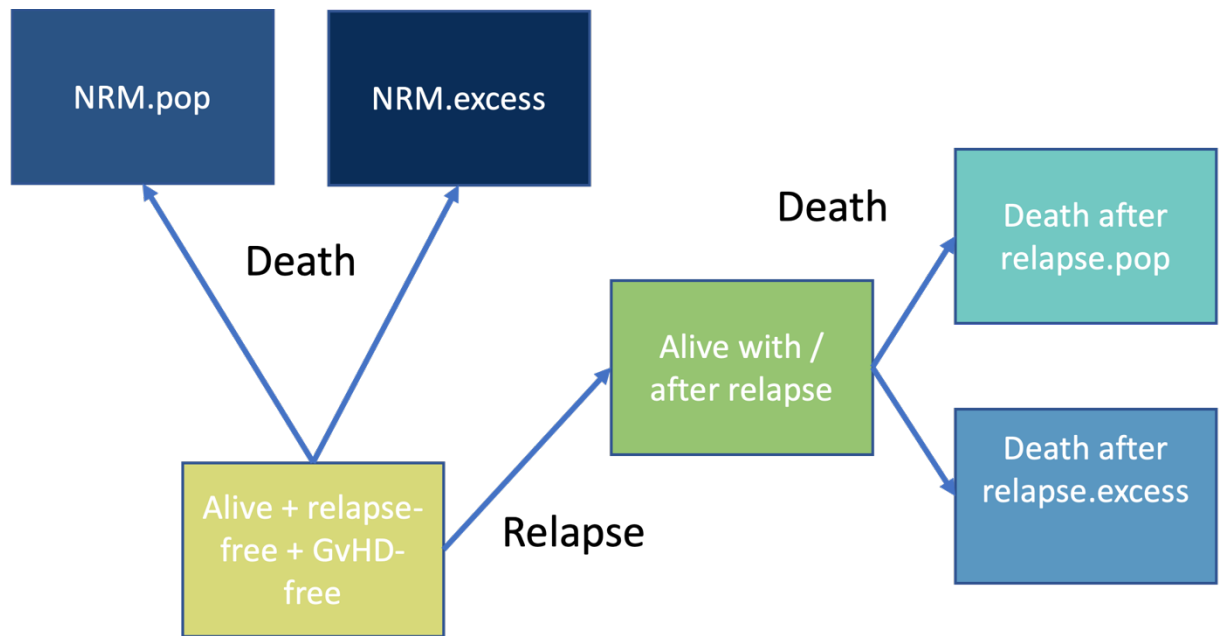

**Supplemental figure 2.2 Schematic representation of multistate models with different split-states.**

Colors of different states fit to final figure color in GRFS environment. Comparison to a German population to divide death events into population (.pop) or excess events.

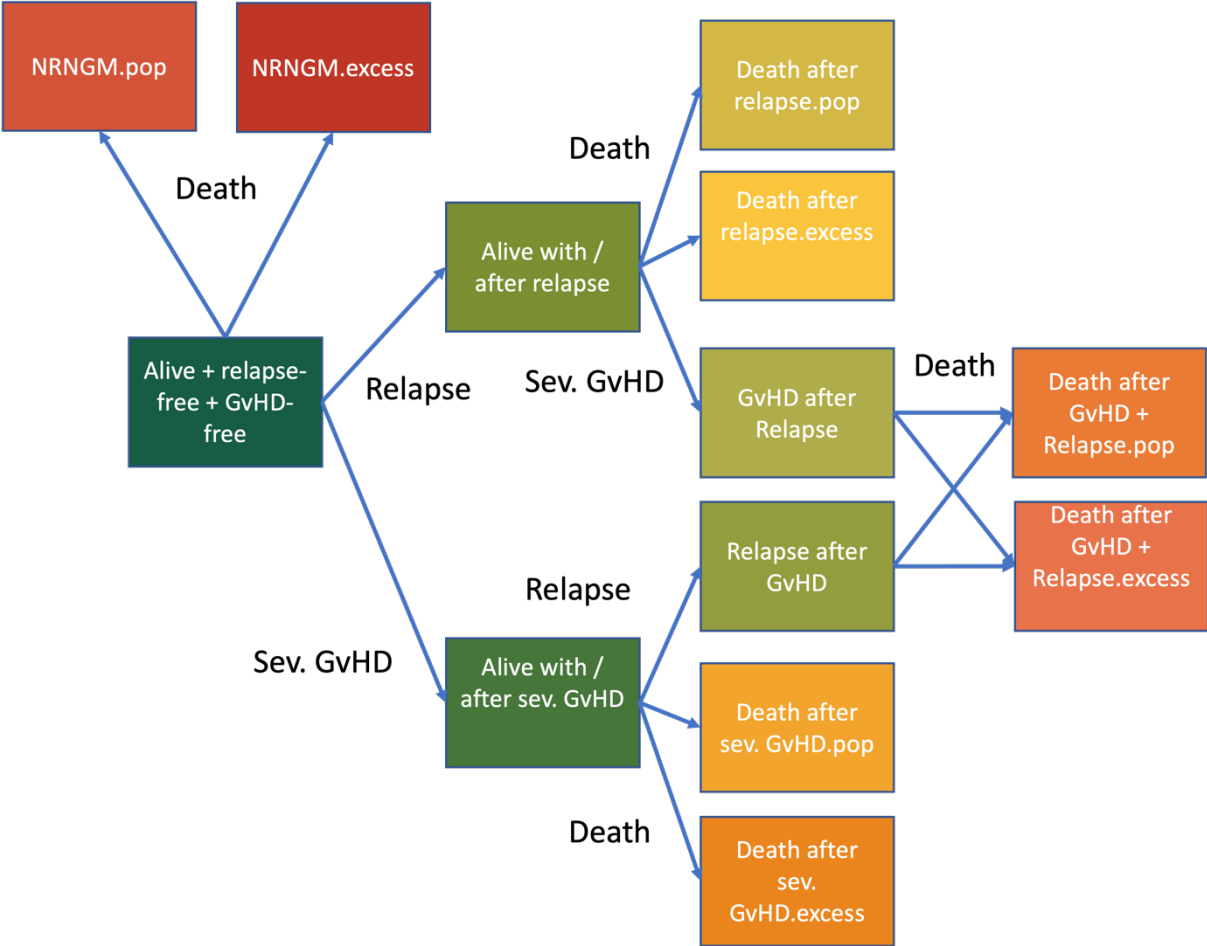

## **Sup 1: Additive Model – reference**

Please refer to the relsurv vignette for an explanation of the additive model. <https://cran.r-project.org/web/packages/relsurv/relsurv.pdf>

Supplemental figure 3 Competing risks of population mortality and disease-specific mortality without multistate integration.

Population data of underlying deathrate-tables of the German population 1998-2018. Importantly, due to competing risks analysis and disease-related death as a competing event the probability of population mortality within the HSCT cohort is lower than in the general population (lower right, 4-year mortality). Plainly, disease is causing a loss of lifetime that would be needed for population mortality to become the reason for death. Please compare the calculated 4-year values to values in table A1.1 and A1.2.

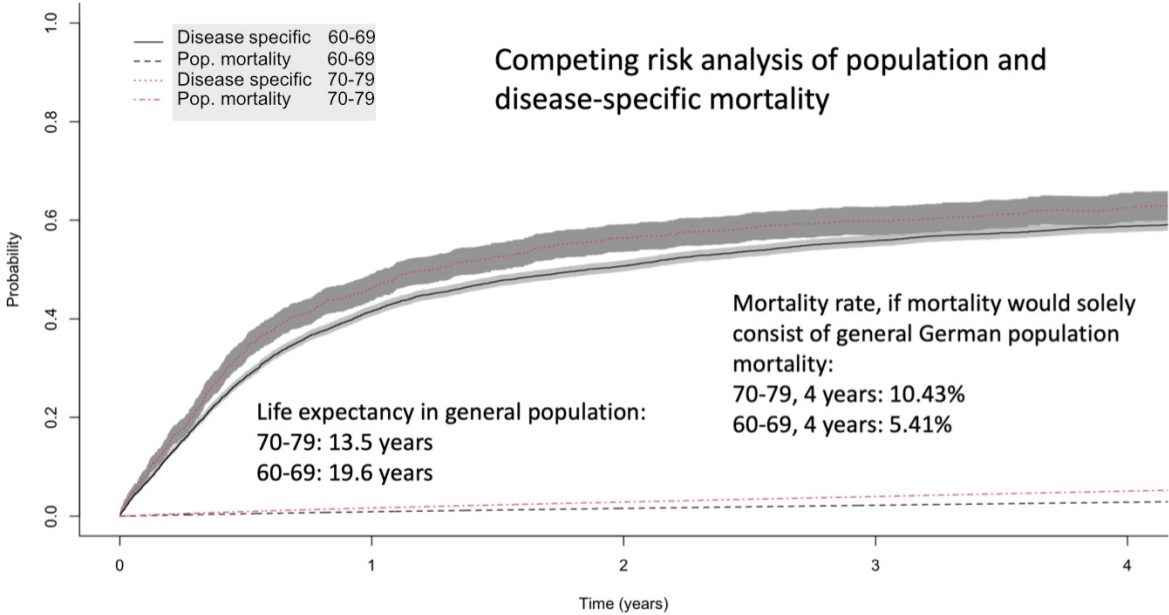



## Excess mortality hazard

Supplemental figure 4.1. Excess mortality hazard in comparison to German general population (age-, sex- and year-matched). Epanechnikov kernel smoothing was obtained via relsurv package in R. Refer to: <https://rdr.io/cran/relsurv/>

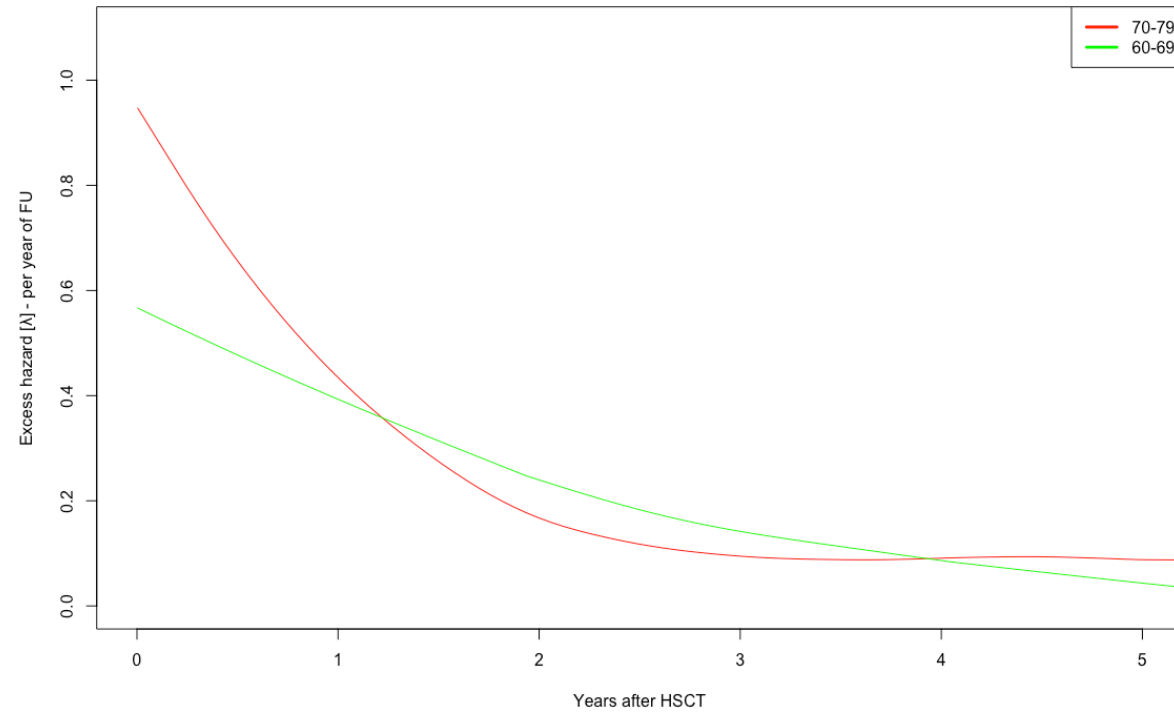

Supplemental figure 4.2. mortality lambda in comparison to German general population (age-, sex- and year-matched) after one year of survival. Epanechnikov kernel smoothing was obtained via relsurv package in R. Refer to: <https://rdrr.io/cran/relsurv/>

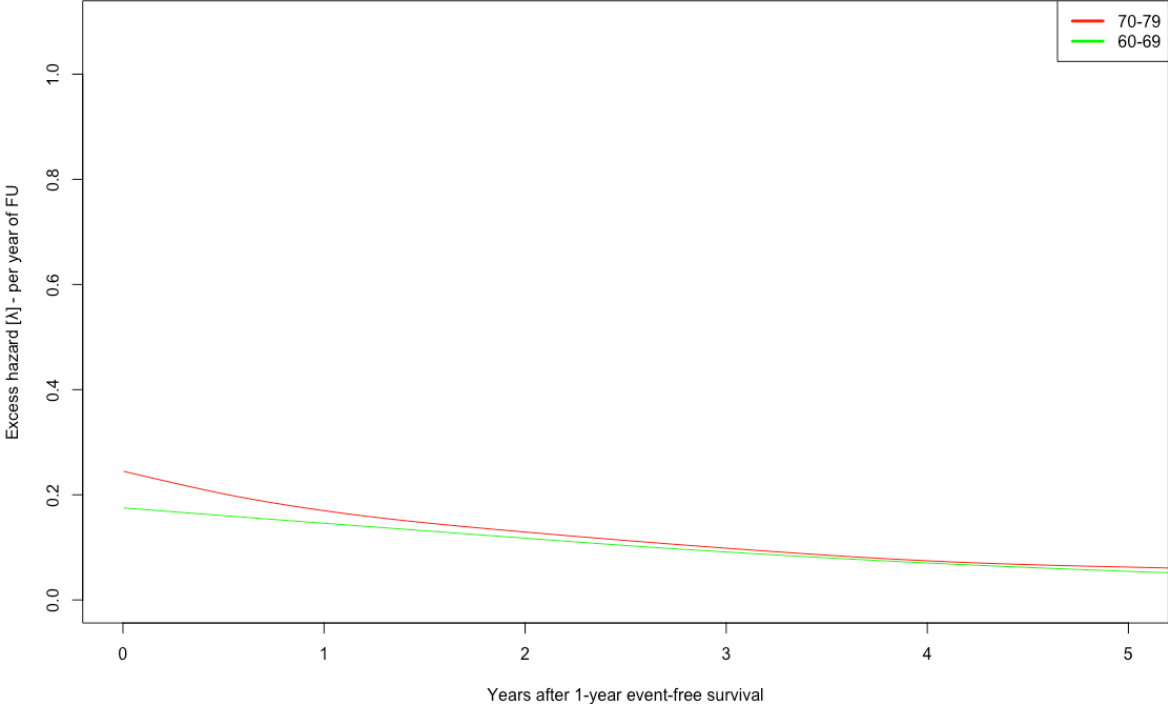

### Multistate Estimations in RFS- and GRFS-environments

Supplemental figure 5.1 Multistate estimations of relapse-free survival and mortality after alloHSCT for all patients aged 70-79.  
 NRM.p Non-relapse-mortality DAR Death after relapse NRNGM Non-relapse-non-GvH-mortality DaGvHD+R Death after GvHD and Relapse  
 DaGvHD Death after GvHD R Relapse; .p due to population mortality, .e due to excess mortality

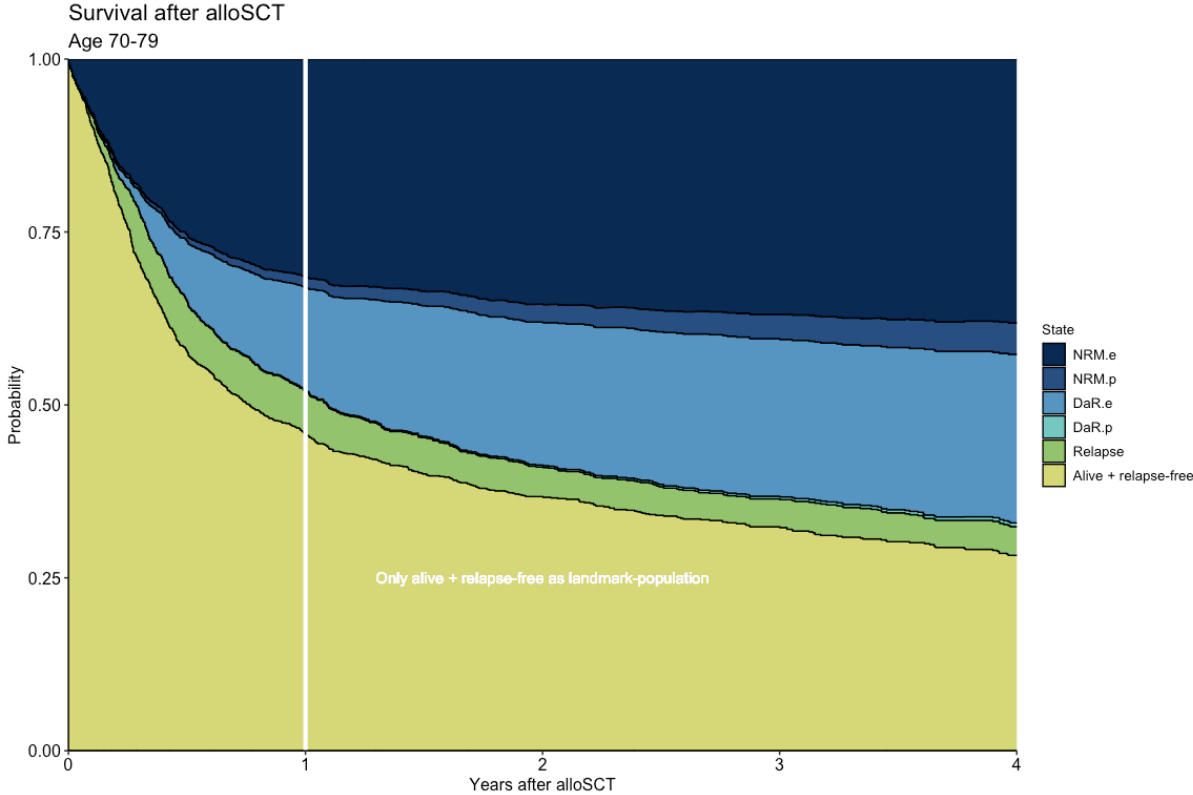

Supplemental figure 5.2. Multistate Estimations of relapse-free survival and mortality after alloHSCT for all patients 60-69.  
 NRM.p Non-relapse-mortality DAR Death after relapse NRNGM Non-relapse-non-GvH-mortality DaGvHD+R Death after GvHD and Relapse  
 DaGvHD Death after GvHD R Relapse; .p due to population mortality, .e due to excess mortality

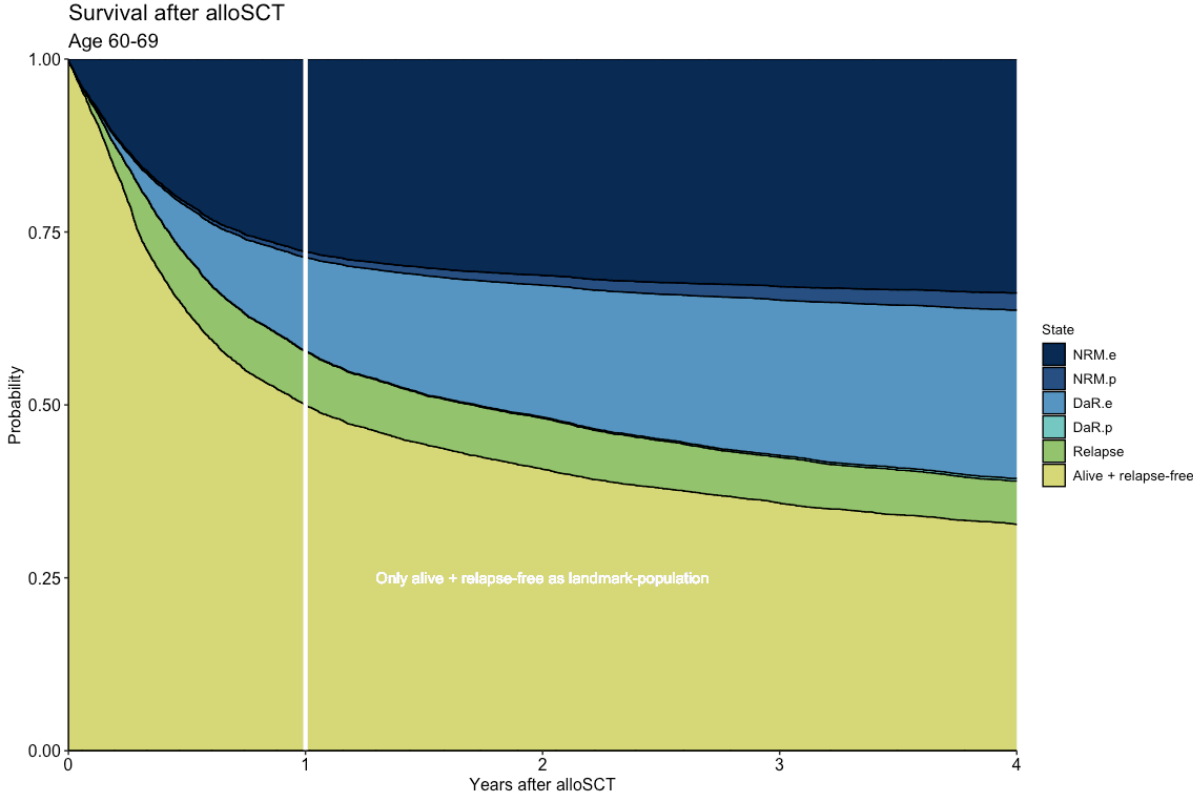

Supplemental figure 5.3. Multistate Estimations of GvH-relapse-free survival and mortality after alloHSCT for all patients 70-79.  
 NRM.p Non-relapse-mortality DAR Death after relapse NRNGM Non-relapse-non-GvH-mortality DaGvHD+R Death after GvHD and Relapse  
 DaGvHD Death after GvHD R Relapse; .p due to population mortality, .e due to excess mortality

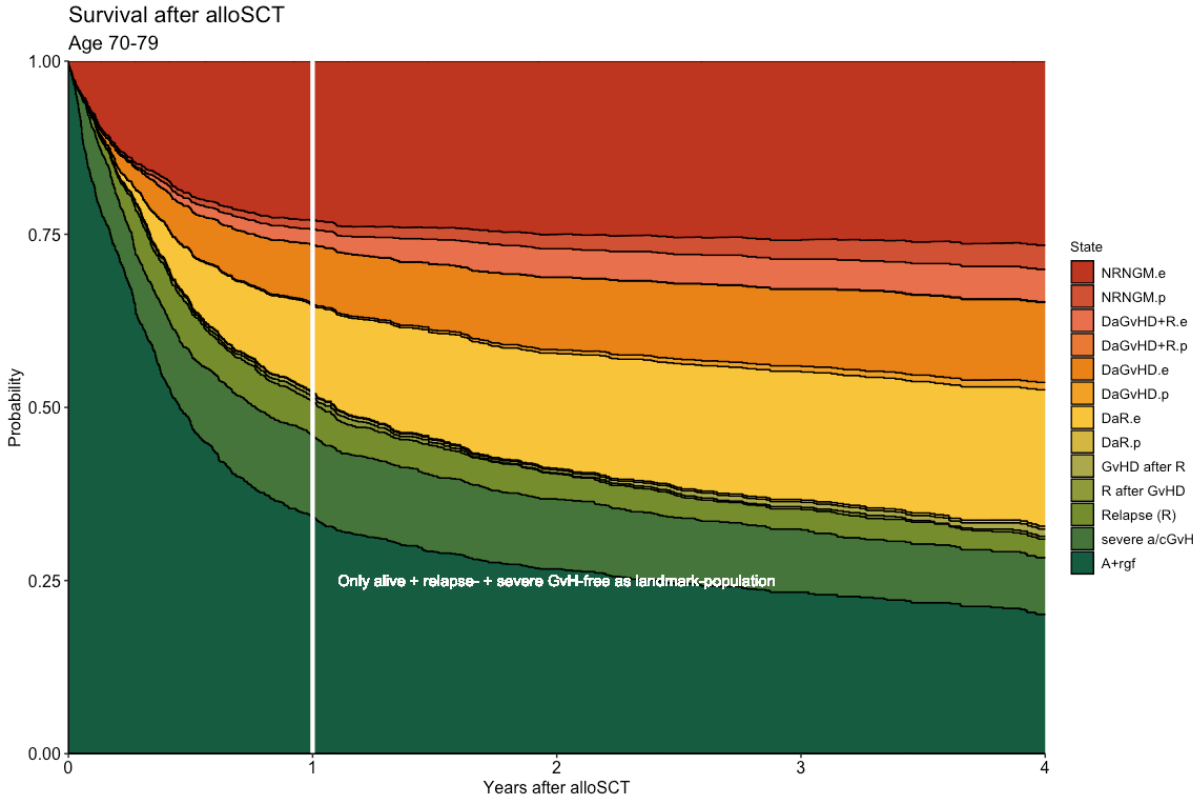

Supplemental figure 5.4. Multistate Estimations of GvH-relapse-free survival and mortality after alloHSCT for all patients 60-69.  
 NRM.p Non-relapse-mortality DAR Death after relapse NRNGM Non-relapse-non-GvH-mortality DaGvHD+R Death after GvHD and Relapse  
 DaGvHD Death after GvHD R Relapse; .p due to population mortality, .e due to excess mortality

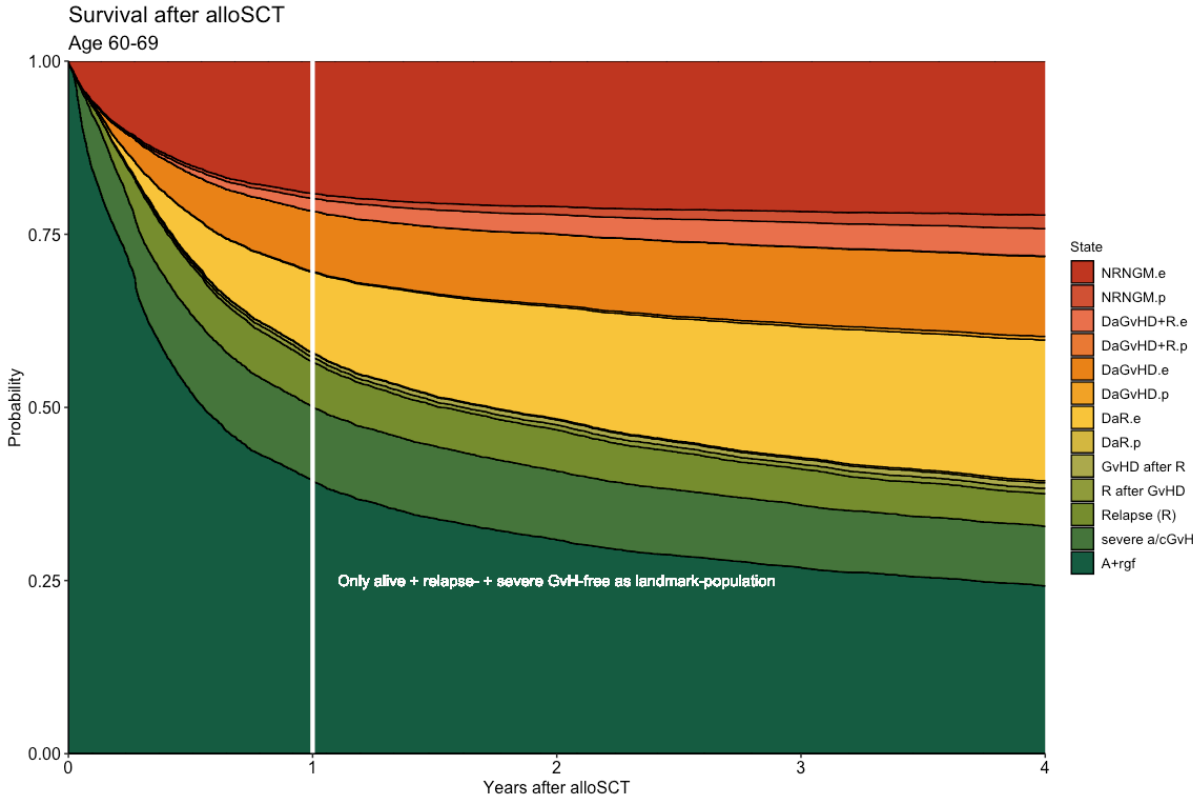

## Outcomes from RFS-multistate

Supplemental table 3.1. Multistate estimations, patients divided by age group.

All estimations in % [SE] [95CI].

| Multistate probabilities of being in state x | 1 year after HSCT, 70+            | 2 years after HSCT, 70+           | 4 years after HSCT, 70+           | 1 year after HSCT, 60-69          | 2 years after HSCT, 60-69         | 4 years after HSCT, 60-69         |
|----------------------------------------------|-----------------------------------|-----------------------------------|-----------------------------------|-----------------------------------|-----------------------------------|-----------------------------------|
| alive+relapse-free                           | 45.59% [SE 1.22] [CI 43.26-48.05] | 36.75% [SE 0.95] [CI 34.93-38.67] | 28.25% [SE 0.87] [CI 26.6-30.01]  | 49.91% [SE 0.3] [CI 49.32-50.51]  | 40.7% [SE 0.7] [CI 39.36-42.09]   | 32.73% [SE 0.67] [CI 31.45-34.06] |
| alive after or alive with relapse            | 6.3% [SE 1.15] [CI 4.41-9.01]     | 4.29% [SE 0.63] [CI 3.23-5.71]    | 4.15% [SE 0.56] [CI 3.19-5.41]    | 7.84% [SE 0.33] [CI 7.23-8.51]    | 7.37% [SE 0.22] [CI 6.96-7.81]    | 6.28% [SE 0.28] [CI 5.76-6.85]    |
| death after relapse, due to pop.mort         | 0.13% [SE 0.01] [CI 0.11-0.16]    | 0.27% [SE 0.03] [CI 0.21-0.34]    | 0.54% [SE 0.05] [CI 0.46-0.64]    | 0.08% [SE 0] [CI 0.07-0.08]       | 0.18% [SE 0] [CI 0.17-0.18]       | 0.37% [SE 0.01] [CI 0.35-0.39]    |
| death after relapse, due to exc.mort         | 14.84% [SE 0.96] [CI 13.07-16.85] | 20.67% [SE 0.97] [CI 18.86-22.65] | 24.37% [SE 1.05] [CI 22.39-26.52] | 13.49% [SE 0.2] [CI 13.11-13.88]  | 19.05% [SE 0.16] [CI 18.73-19.37] | 24.33% [SE 0.35] [CI 23.64-25.03] |
| NRM, pop.mort                                | 1.54% [SE 0.02] [CI 1.51-1.58]    | 2.58% [SE 0.06] [CI 2.47-2.7]     | 4.54% [SE 0.11] [CI 4.33-4.76]    | 0.83% [SE 0.01] [CI 0.82-0.85]    | 1.42% [SE 0.02] [CI 1.39-1.45]    | 2.48% [SE 0.04] [CI 2.41-2.55]    |
| NRM, exc.mort                                | 31.59% [SE 1.1] [CI 29.51-33.82]  | 35.44% [SE 0.96] [CI 33.61-37.36] | 38.14% [SE 1.36] [CI 35.57-40.91] | 27.84% [SE 0.46] [CI 26.96-28.76] | 31.28% [SE 0.58] [CI 30.16-32.44] | 33.81% [SE 0.67] [CI 32.51-35.16] |

Supplemental table 3.2. Multistate estimations after one year EF-survival, patients divided by age group. All estimations in % [SE] [95CI].

| Multistate probabilities of being in state x | 1 year after 1-year-RFS-LM, 70+   | 3 years after 1-year-RFS-LM, 70+  | 1 year after 1-year-RFS-LM, 60-69 | 3 years after 1-year-RFS-LM, 60-69 |
|----------------------------------------------|-----------------------------------|-----------------------------------|-----------------------------------|------------------------------------|
| alive+relapse-free                           | 80.62% [SE 1.16] [CI 78.36-82.93] | 61.97% [SE 1.61] [CI 58.89-65.22] | 81.55% [SE 1.11] [CI 79.41-83.75] | 65.57% [SE 0.95] [CI 63.74-67.47]  |
| alive after or alive with relapse            | 4.95% [SE 0.76] [CI 3.67-6.68]    | 7.39% [SE 1.08] [CI 5.55-9.85]    | 7.47% [SE 0.48] [CI 6.58-8.48]    | 9.34% [SE 0.44] [CI 8.52-10.24]    |

| <b>Multistate probabilities of being in state x</b> | <b>1 year after 1-year-RFS-LM, 70+</b> | <b>3 years after 1-year-RFS-LM, 70+</b> | <b>1 year after 1-year-RFS-LM, 60-69</b> | <b>3 years after 1-year-RFS-LM, 60-69</b> |
|-----------------------------------------------------|----------------------------------------|-----------------------------------------|------------------------------------------|-------------------------------------------|
| death after relapse, due to pop.mort                | 0.11% [SE 0.01] [CI 0.08-0.14]         | 0.53% [SE 0.07] [CI 0.41-0.68]          | 0.06% [SE 0.01] [CI 0.05-0.07]           | 0.31% [SE 0.02] [CI 0.28-0.36]            |
| death after relapse, due to exc.mort                | 3.61% [SE 0.58] [CI 2.63-4.95]         | 9.16% [SE 1.13] [CI 7.19-11.67]         | 2.87% [SE 0.2] [CI 2.5-3.28]             | 9.52% [SE 0.43] [CI 8.72-10.39]           |
| NRM, pop.mort                                       | 2.28% [SE 0.05] [CI 2.18-2.39]         | 6.57% [SE 0.12] [CI 6.35-6.8]           | 1.18% [SE 0.01] [CI 1.15-1.21]           | 3.3% [SE 0.05] [CI 3.21-3.4]              |
| NRM, exc.mort                                       | 8.44% [SE 0.58] [CI 7.37-9.65]         | 14.38% [SE 1.52] [CI 11.69-17.68]       | 6.88% [SE 0.57] [CI 5.85-8.09]           | 11.95% [SE 0.55] [CI 10.91-13.08]         |



## Outcomes from GRFS-multistate

Supplemental table 3.3. Multistate estimations, patients divided by age group.  
All estimations in % [SE] [95CI].

| Multistate probabilities of being in state x | 1 year after HSCT, 70+            | 2 years after HSCT, 70+           | 4 years after HSCT, 70+           | 1 year after HSCT, 60-69          | 2 years after HSCT, 60-69         | 4 years after HSCT, 60-69         |
|----------------------------------------------|-----------------------------------|-----------------------------------|-----------------------------------|-----------------------------------|-----------------------------------|-----------------------------------|
| alive+GvHD&relapse-free                      | 34.08% [SE 0.95] [CI 32.27-36]    | 26.69% [SE 0.97] [CI 24.86-28.66] | 20.13% [SE 0.63] [CI 18.93-21.42] | 39.37% [SE 0.49] [CI 38.41-40.34] | 30.87% [SE 0.69] [CI 29.55-32.26] | 24.23% [SE 0.56] [CI 23.15-25.35] |
| alive after or alive with sev. GvHD          | 11.59% [SE 0.43] [CI 10.78-12.45] | 10.12% [SE 0.33] [CI 9.5-10.78]   | 8.18% [SE 0.57] [CI 7.14-9.37]    | 10.65% [SE 0.28] [CI 10.12-11.21] | 9.93% [SE 0.17] [CI 9.59-10.27]   | 8.59% [SE 0.28] [CI 8.07-9.15]    |
| alive after or alive with relapse            | 5.02% [SE 1.02] [CI 3.37-7.48]    | 3.66% [SE 0.67] [CI 2.55-5.24]    | 2.68% [SE 0.56] [CI 1.79-4.02]    | 6.57% [SE 0.41] [CI 5.82-7.42]    | 5.97% [SE 0.27] [CI 5.46-6.52]    | 4.73% [SE 0.24] [CI 4.28-5.23]    |
| Relapse after GvHD                           | 0.72% [SE 0.17] [CI 0.45-1.15]    | 0.13% [SE 0.05] [CI 0.06-0.29]    | 0.4% [SE 0.11] [CI 0.23-0.71]     | 0.69% [SE 0.08] [CI 0.56-0.87]    | 0.71% [SE 0.09] [CI 0.56-0.9]     | 0.78% [SE 0.06] [CI 0.67-0.91]    |
| GvHD after Relapse                           | 0.56% [SE 0.16] [CI 0.31-1]       | 0.42% [SE 0.17] [CI 0.19-0.93]    | 1.05% [SE 0.38] [CI 0.52-2.13]    | 0.57% [SE 0.03] [CI 0.51-0.64]    | 0.71% [SE 0.13] [CI 0.51-1.01]    | 0.79% [SE 0.1] [CI 0.62-1.02]     |
| death after relapse,due to pop.mort          | 0.11% [SE 0.01] [CI 0.09-0.14]    | 0.23% [SE 0.03] [CI 0.17-0.29]    | 0.42% [SE 0.04] [CI 0.35-0.51]    | 0.07% [SE 0] [CI 0.06-0.07]       | 0.15% [SE 0] [CI 0.14-0.15]       | 0.3% [SE 0.01] [CI 0.28-0.31]     |
| death after relapse, due to exc.mort         | 12.56% [SE 0.94] [CI 10.84-14.55] | 16.61% [SE 0.91] [CI 14.92-18.49] | 19.68% [SE 1.15] [CI 17.56-22.05] | 11.59% [SE 0.16] [CI 11.28-11.9]  | 16.16% [SE 0.08] [CI 16.01-16.31] | 20.32% [SE 0.36] [CI 19.63-21.03] |
| death after GvHD,due to pop.mort             | 0.24% [SE 0] [CI 0.23-0.25]       | 0.52% [SE 0.02] [CI 0.49-0.56]    | 1.07% [SE 0.04] [CI 0.98-1.16]    | 0.12% [SE 0] [CI 0.12-0.13]       | 0.26% [SE 0] [CI 0.25-0.26]       | 0.52% [SE 0.01] [CI 0.5-0.53]     |
| death after GvHD, due to exc.mort            | 8.62% [SE 0.44] [CI 7.79-9.53]    | 10.4% [SE 0.53] [CI 9.41-11.5]    | 11.54% [SE 0.5] [CI 10.61-12.56]  | 8.72% [SE 0.22] [CI 8.31-9.16]    | 10.24% [SE 0.28] [CI 9.71-10.8]   | 11.53% [SE 0.36] [CI 10.84-12.26] |
| death after relapse+GvHD,due to pop.mort     | 0.02% [SE 0] [CI 0.02-0.02]       | 0.04% [SE 0] [CI 0.03-0.05]       | 0.11% [SE 0.02] [CI 0.08-0.17]    | 0.01% [SE 0] [CI 0.01-0.01]       | 0.03% [SE 0] [CI 0.02-0.03]       | 0.07% [SE 0.01] [CI 0.06-0.09]    |
| death after relapse+GvHD, due to exc.mort    | 2.23% [SE 0.18] [CI 1.9-2.62]     | 4.1% [SE 0.17] [CI 3.78-4.43]     | 4.68% [SE 0.24] [CI 4.23-5.17]    | 1.83% [SE 0.07] [CI 1.71-1.96]    | 2.81% [SE 0.15] [CI 2.53-3.11]    | 3.95% [SE 0.18] [CI 3.62-4.32]    |

| <b>Multistate probabilities of being in state x</b> | <b>1 year after HSCT, 70+</b>     | <b>2 years after HSCT, 70+</b> | <b>4 years after HSCT, 70+</b>    | <b>1 year after HSCT, 60-69</b>  | <b>2 years after HSCT, 60-69</b> | <b>4 years after HSCT, 60-69</b>  |
|-----------------------------------------------------|-----------------------------------|--------------------------------|-----------------------------------|----------------------------------|----------------------------------|-----------------------------------|
| NRNGM, pop.mort                                     | 1.3% [SE 0.02] [CI 1.27-1.34]     | 2.06% [SE 0.05] [CI 1.98-2.15] | 3.48% [SE 0.1] [CI 3.28-3.69]     | 0.71% [SE 0.01] [CI 0.69-0.73]   | 1.17% [SE 0.02] [CI 1.13-1.2]    | 1.97% [SE 0.04] [CI 1.9-2.04]     |
| NRNGM, exc.mort                                     | 22.95% [SE 0.95] [CI 21.16-24.89] | 25.02% [SE 1] [CI 23.13-27.07] | 26.58% [SE 1.15] [CI 24.42-28.93] | 19.1% [SE 0.27] [CI 18.57-19.64] | 21% [SE 0.33] [CI 20.36-21.66]   | 22.22% [SE 0.31] [CI 21.61-22.84] |

Supplemental table 3.4. Multistate estimations after one year of GRF-survival, patients divided by age group. All estimations in % [SE] [95CI]. GRFS Graft-versus-Host-free-relapse-free-survival.

| <b>Multistate probabilities of being in state x</b> | <b>1 year after 1-year-GRFS-LM, 70+</b> | <b>3 years after 1-year-GRFS-LM, 70+</b> | <b>1 year after 1-year-GRFS-LM, 60-69</b> | <b>3 years after 1-year-GRFS-LM, 60-69</b> |
|-----------------------------------------------------|-----------------------------------------|------------------------------------------|-------------------------------------------|--------------------------------------------|
| alive+GvHD&relapse-free                             | 78.31% [SE 2.78] [CI 73.05-83.96]       | 59.07% [SE 1.73] [CI 55.77-62.57]        | 78.43% [SE 0.87] [CI 76.73-80.16]         | 61.54% [SE 0.9] [CI 59.79-63.34]           |
| alive after or alive with sev. GvHD                 | 3.72% [SE 0.96] [CI 2.24-6.18]          | 4.27% [SE 0.88] [CI 2.85-6.4]            | 3.94% [SE 0.37] [CI 3.27-4.74]            | 5.49% [SE 0.49] [CI 4.61-6.54]             |
| alive after or alive with relapse                   | 5.5% [SE 1.27] [CI 3.49-8.66]           | 6.42% [SE 1.28] [CI 4.34-9.49]           | 7.77% [SE 0.57] [CI 6.73-8.97]            | 9.03% [SE 0.56] [CI 8-10.19]               |
| Relapse after GvHD                                  | 0.02% [SE 0.01] [CI 0.01-0.04]          | 0.18% [SE 0.06] [CI 0.1-0.35]            | 0.15% [SE 0.02] [CI 0.11-0.18]            | 0.34% [SE 0.06] [CI 0.24-0.48]             |
| GvHD after Relapse                                  | 0.25% [SE 0.21] [CI 0.04-1.36]          | 1.64% [SE 0.8] [CI 0.63-4.29]            | 0.16% [SE 0.08] [CI 0.06-0.4]             | 0.69% [SE 0.13] [CI 0.48-1]                |
| death after relapse,due to pop.mort                 | 0.11% [SE 0.02] [CI 0.08-0.17]          | 0.51% [SE 0.08] [CI 0.38-0.69]           | 0.06% [SE 0.01] [CI 0.05-0.07]            | 0.31% [SE 0.02] [CI 0.27-0.36]             |
| death after relapse, due to exc.mort                | 3.1% [SE 0.75] [CI 1.92-4.99]           | 9.13% [SE 1.26] [CI 6.97-11.96]          | 3.05% [SE 0.22] [CI 2.65-3.51]            | 9.74% [SE 0.39] [CI 9.02-10.53]            |
| death after GvHD,due to pop.mort                    | 0.07% [SE 0.02] [CI 0.04-0.11]          | 0.31% [SE 0.07] [CI 0.2-0.48]            | 0.03% [SE 0] [CI 0.03-0.04]               | 0.17% [SE 0.02] [CI 0.14-0.21]             |
| death after GvHD, due to exc.mort                   | 0.45% [SE 0.15] [CI 0.24-0.86]          | 0.95% [SE 0.35] [CI 0.46-1.95]           | 0.35% [SE 0.07] [CI 0.24-0.5]             | 1.01% [SE 0.07] [CI 0.87-1.16]             |

| <b>Multistate probabilities of being in state x</b> | <b>1 year after 1-year-GRFS-LM, 70+</b> | <b>3 years after 1-year-GRFS-LM, 70+</b> | <b>1 year after 1-year-GRFS-LM, 60-69</b> | <b>3 years after 1-year-GRFS-LM, 60-69</b> |
|-----------------------------------------------------|-----------------------------------------|------------------------------------------|-------------------------------------------|--------------------------------------------|
| death after relapse+GvHD, due to pop.mort           | 0% [SE 0] [CI 0-0.01]                   | 0.07% [SE 0.02] [CI 0.03-0.13]           | 0% [SE 0] [CI 0-0]                        | 0.02% [SE 0] [CI 0.02-0.03]                |
| death after relapse+GvHD, due to exc.mort           | 0.15% [SE 0.05] [CI 0.08-0.27]          | 0.42% [SE 0.2] [CI 0.16-1.09]            | 0.07% [SE 0.02] [CI 0.04-0.13]            | 0.52% [SE 0.06] [CI 0.43-0.65]             |
| NRNGM, pop.mort                                     | 2.23% [SE 0.06] [CI 2.12-2.34]          | 6.38% [SE 0.23] [CI 5.95-6.85]           | 1.15% [SE 0.01] [CI 1.14-1.17]            | 3.2% [SE 0.04] [CI 3.13-3.27]              |
| NRNGM, exc.mort                                     | 6.08% [SE 0.37] [CI 5.39-6.86]          | 10.64% [SE 2.07] [CI 7.27-15.59]         | 4.84% [SE 0.32] [CI 4.25-5.51]            | 7.93% [SE 0.36] [CI 7.26-8.66]             |

## 2. Completeness of Follow-up

To provide an appropriate estimation of survival rates, we broke follow-up down to observed and potential periods to enable calculation of completeness of follow-up (Clark TG, Altman DG, De Stavola BL. Quantification of the completeness of follow-up. Lancet. 2002).

Criteria for completeness were: (1) death (2) last FU < 1 year before data set closure (3) FU > 10 years. Only patients with transplantation two years before dataset closure were part of the statistical analysis. Median observed follow-up (documented follow-up irrespective of censor or death) was 1 year [range 0-22.4] and median potential follow-up was 1.8 years [range 0-10] for all patients. Potential follow-up for a patient with death at last date of follow-up was his survival time while in all censored patients the potential follow-up was the period between transplantation and 2020-05-01. Dataset closure was 2021-05-01. Completeness was the ratio of the sum of all observed follow-up and the sum of all potential follow-up times 100 (Clark TG, Altman DG, De Stavola BL. Quantification of the completeness of follow-up. Lancet. 2002).

Completeness (C-Index) was 60% averaged over patients. Completeness of follow-up as a potential source of bias between age groups was examined and found similar (60-69: 60%, 70-79: 60.6%).

The final analysis cohort for all models (Kaplan-Meier, Multistate, Regression) was built from all centers achieving a 50% completeness of follow-up (50 centers, n = 8,560 60-69, n = 1,427 70-79). Within the analysis cohort, observed follow-up was 1 year [range 0-22.4] and potential follow-up was 1.8 years [range 0-22.2] for all patients. Completeness (C-Index) was 64.1%, again averaged over patients.



*Graphical overview of missing values before imputation. Light blue depicts missing values. Dark blue data was fully available after <1% of patients was excluded for violation of inclusion criteria. On average 8.88% of data was missing, which was answered with imputation of 100 dataframes and 10 iterations. Top three missing data were HLA data (56.98%), Donor Age (52.25%) and Comorbidity (45.2%).*

*GVHD prophylaxis – GvHD Prophylaxis, Status – Remission status at HSCT (CR vs. no CR only)*

## 2. Reasons for missingness

2.1. The reasons for missingness remain unclear. Some lack of full documentation might be linked to early death – spoken from our experience.

Although some clustering could be observed, most of the missing data did not follow an obvious pattern (see graphical display). The only exception might be a known underreport of HLA data in unrelated donors. We nevertheless have to assume a center dependent degree of missingness for some covariates (donor age, comorbidities, HLA-match). In sum we assumed a missing at random (MAR) pattern for missing values.

3. Consequences We suppose the consequences to be minimal for most of the article's content. Primary outcomes as death date and status as well as relapse date and status are fully reported. Some important covariates however (donor age, HLA-data, comorbidities) show a high proportion of missingness (> 40%) with introducing possible bias into regression analyses. However, the main covariates of interest (age) were fully reported. Sex and year of HSCT were also nearly fully reported which would introduce minimal bias to relative survival analysis.

4. Methods of imputation: A multiple imputation strategy was used to account for the high proportion of missingness. We chose a higher count of imputed datasets to be accountable for the higher proportion of missing covariate data in some covariates (m=100, iterations = 10, m = 20, iterations = 10 for additive model).

Missing time to aGvHD was simply filled with random day counts from all reported patients.

5. Software: We used R and its package mice to obtain multiple datasets that could be introduced into regression analyses thereafter. The linked method there was **multiple imputation by chained equations** after Stef van Buuren and Karin Groothuis-Oudshoorn, 2011. (Ref.: van Buuren, S., & Groothuis-Oudshoorn, K. (2011). mice: Multivariate Imputation by Chained Equations in R. Journal of Statistical Software, 45(3), 1–67. <https://doi.org/10.18637/jss.v045.i03>)
6. Number of imputed datasets:  $m = 100$ , max iterations 10 for Cox regression, 20 for additive model due to computational limits.
7. Imputation model:
  - 7.1. An imputation model was set after creating a predictor matrix. At least 30% of a predictor's values had to be available to be considered a predictor. A minimum correlation of 0.1 (Pearson's  $r$ ) was set to choose possible predictors for every imputed variable. Thereby, we aimed to prevent massive imputation.

All covariates with exception to survival data were used for imputation. A Nelson-Aalen estimate and the survival status indicator of the cumulative hazard for overall survival was integrated. Categorical covariates with two possible values were imputed using logistic regression and covariates with more than two outcomes after Bayesian polytomous regression modelling ("logreg," "polyreg", see <https://www.rdocumentation.org/packages/mice/versions/3.14.0/topics/mice.impute.polyreg>). Numeric values were imputed after predictive mean matching ("pmm").
  - 7.2. Relapse, aGvHD and cGvHD were treated as "*non-existing/no event*" when reported as not available (NA).
  - 7.3. Missing data (NA) accounted for 462/9987 patients concerning relapse.

7.4. 6734/9987 patients concerning cGvHD were documented “NA” and were treated as non-sufferers. This is how it is supposed to be documented correct in the registry. Stating this, we believe in and fully accept an error of 5%.

Concerning the first entries for cGvHD exemplarily, 1326/9987 patients were documented as suffering from extensive GvHD. Other entries (“ “, “moderate”, “99”, “NA”) were documented as not relevant to the study. In the end, 1614 patients (respecting all possible entry and grade data) could be registered with severe cGvHD and a documented date.

7.5. 539 (NA) + 68 (present, grade unknown)/9987 for acute GvHD were unknown and treated as “no acute GvHD” until day 100. Of all 9987, 1198 had aGvHD grade 3 (n=785) or grade 4 (n=413). In addition, for nearly half of these (n=587) the date of symptom onset was missing. This was filled with random data from all other entered aGvHD dates with respect to the overall survival of the respected patient. In the end, date data were fully completed in this random method, using a “seed” for reproducibility. Median and mean days to aGvHD were 25 days and 37 days for all grade 3+4 before random fill up and 24 and 35 thereafter.

## 8. Derived variables:

8.1. Some data was imputed in its processed format (CMV relation). We preferred an imputation for categorical values. Donor age however was kept in its numerical form and was mutated into its factor (“younger than median”, “older than median”) in a second step in all imputed datasets.

9. Diagnostics: In multiple imputation it is of crucial importance to introduce variance in the imputed values between all imputations. It is therefore important that imputed values graphically show convergence (crossing lines between imputations) without creating a trend value (low variance).



9.1. The success of iterations could be observed observing a convergence of mean and sd in most of the covariates. HLA-data, comorbidities and donor age however were difficult to be imputed. After imputation, all data was plausible with the exception for HLA-data where unmatched donors seemed to be quantitatively overestimated.

9.2. Convergence was checked graphically (see below).

10. Pooling: The results of regression analyses were pooled (R package mice, pool()); Rubin’s Rule; see Rubin, D.B. (1987). Multiple Imputation for Nonresponse in Surveys. New York: John Wiley and Sons.) for all datasets and displayed. No transformation was undergone.

11. Complete-case analysis: A complete case-analysis (n=1153) was done for the chosen covariates for the overall survival Cox regression. The results for the main covariate of interest (age group) was similar.

| term                  | string                       |
|-----------------------|------------------------------|
| Age 70-79, ref. 60-69 | HR 1.32 [1.1-1.59], p=0.003  |
| CLL, ref. AML         | HR 1.11 [0.58-2.13], p=n.s   |
| CML                   | HR 1.24 [0.51-3.03], p=n.s   |
| Lymphoma              | HR 1.16 [0.79-1.69], p=n.s   |
| MDS/MPN               | HR 0.7 [0.59-0.84], p=<0.001 |
| Others                | HR 0.95 [0.6-1.49], p=n.s    |
| Plasma cell disorders | HR 1.43 [0.85-2.38], p=n.s   |

| term                                    | string                        |
|-----------------------------------------|-------------------------------|
| Male, ref. female                       | HR 1.04 [0.89-1.21], p=n.s    |
| Comorbidity, ref. No                    | HR 1.12 [0.95-1.31], p=n.s    |
| Int TCI, ref. high                      | HR 0.96 [0.52-1.77], p=n.s    |
| Low TCI                                 | HR 0.99 [0.53-1.82], p=n.s    |
| Karnofsky < 80, ref. 90-100             | HR 1.78 [1.43-2.22], p=<0.001 |
| Karnofsky 80                            | HR 1.12 [0.95-1.32], p=n.s    |
| CMV – both positive, ref. both negative | HR 1.21 [1.01-1.45], p=0.037  |
| CMV – neg. patient, pos. donor          | HR 1.17 [0.88-1.56], p=n.s    |
| CMV – pos. patient, neg. donor          | HR 1.08 [0.87-1.33], p=n.s    |
| Unrelated, ref. related                 | HR 1.02 [0.81-1.29], p=n.s    |
| TBI, ref. no                            | HR 1.18 [0.95-1.46], p=n.s    |
| HLA, ref. match                         | HR 1.34 [1.05-1.7], p=0.02    |
| Donor Age                               | HR 1.01 [1-1.01], p=n.s       |
| Period 2009-2018, ref. 1998-2008        | HR 1.06 [0.85-1.31], p=n.s    |
| Stemcellsource, ref. BM                 | HR 0.81 [0.61-1.08], p=n.s    |
| Status in CR, ref. No                   | HR 0.69 [0.57-0.83], p=<0.001 |

Supplemental table 4. Hazard ratios, derived from complete case analysis before imputation (n = 1453).

#### **4. Additional data**

Supplemental figure 6

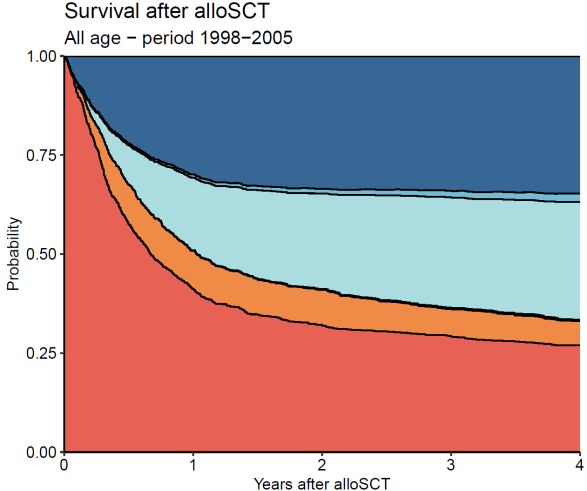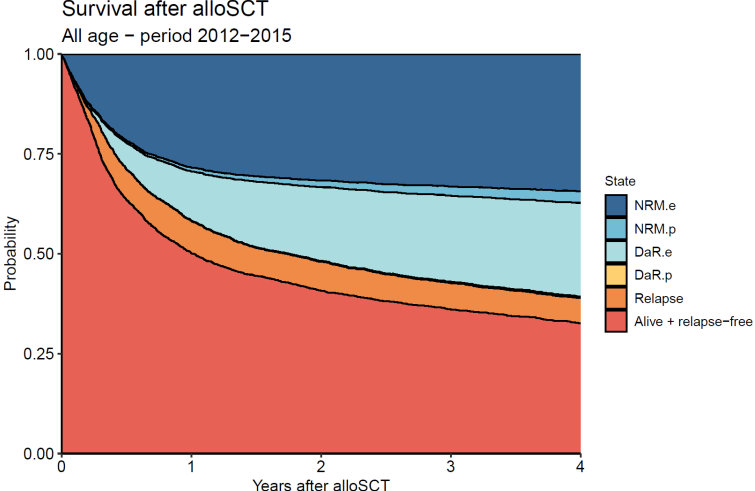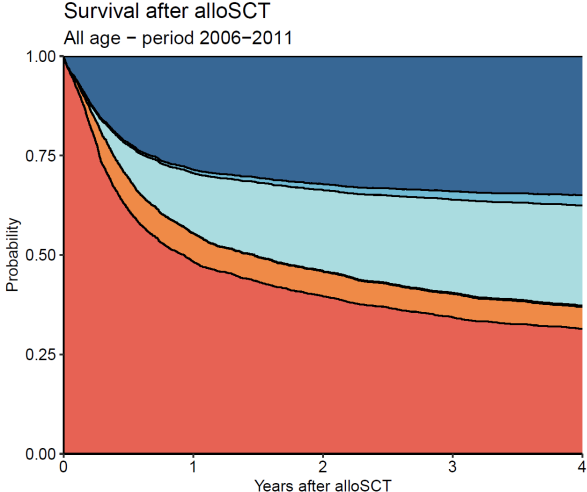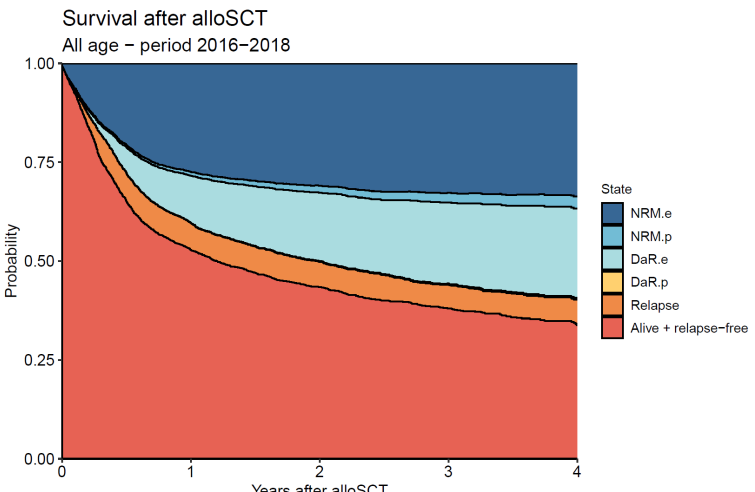

Supplemental figure 7.1 – Schoenfeld residuals for follow-up > 50%

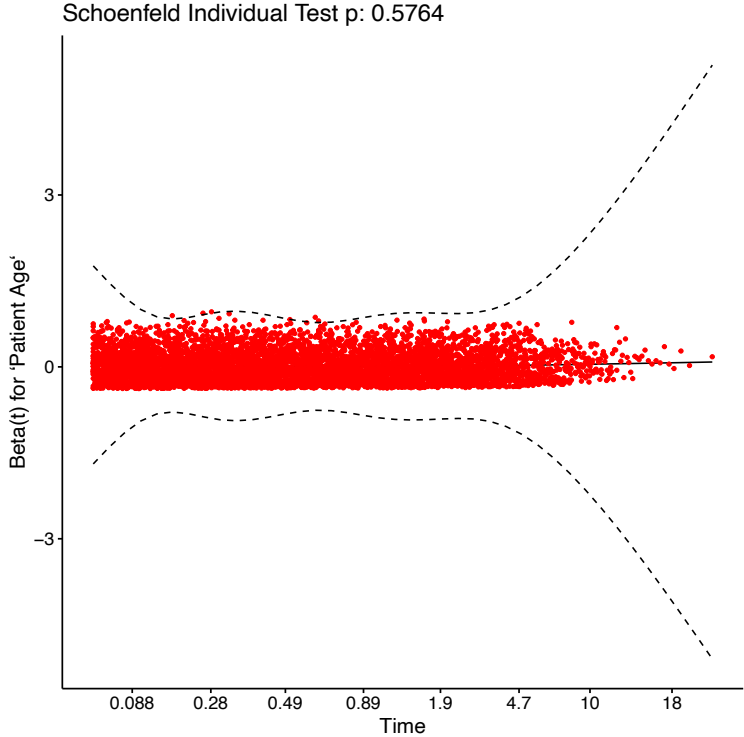

Supplemental figure 7.2 – Schoenfeld residuals for follow-up > 80%

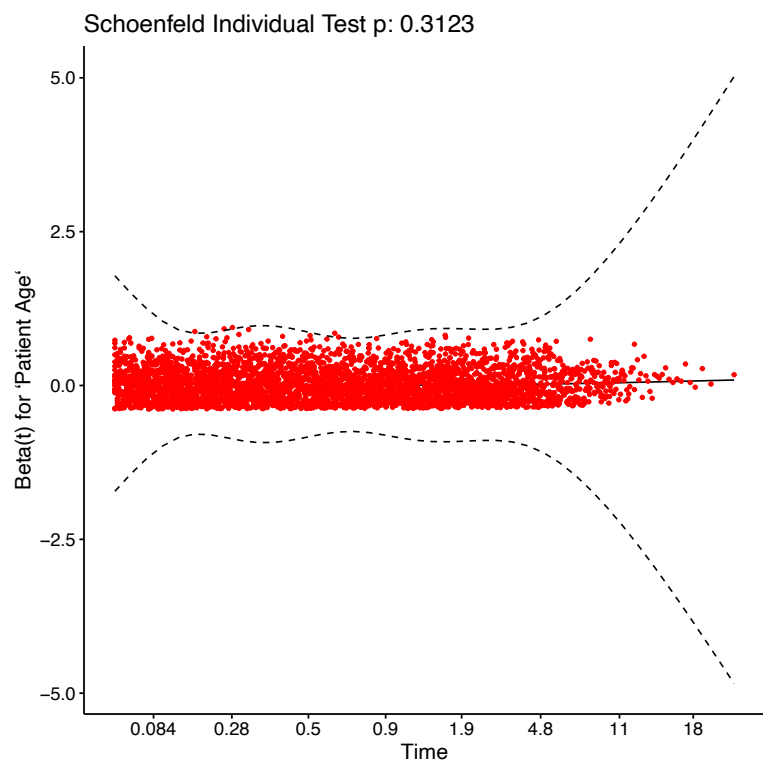

| Covariate                           | Cox regression regarding overall survival (OS) |                                 |                               | Additive proportional hazards model regarding excess mortality <sup>†</sup> |                                 |                               |
|-------------------------------------|------------------------------------------------|---------------------------------|-------------------------------|-----------------------------------------------------------------------------|---------------------------------|-------------------------------|
|                                     | Total FU*<br>HR [95%CI]                        | First year of FU*<br>HR [95%CI] | Years 1+ of FU*<br>HR [95%CI] | Total FU*<br>HR [95%CI]                                                     | First year of FU*<br>HR [95%CI] | Years 1+ of FU*<br>HR [95%CI] |
| <b>Age group ref. 60-69</b>         | 1                                              | 1                               | 1                             | 1                                                                           | 1                               | 1                             |
| 70-79                               | 1.19 [1.1-1.28], p<0.001                       | 1.18 [1.08-1.29], p<0.001       | 1.22 [1.07-1.4], p=0.004      | 1.14 [1.05-1.24], p=0.001                                                   | 1.16 [1.06-1.27], p=0.001       | 1.09 [0.91-1.3], p=0.35       |
| <b>Disease, ref. acute leukemia</b> | 1                                              | 1                               | 1                             | 1                                                                           | 1                               | 1                             |
| CLL                                 | 0.58 [0.49-0.68], p<0.001                      | 0.53 [0.43-0.65], p<0.001       | 0.68 [0.53-0.88], p=0.003     | 0.53 [0.44-0.63], p<0.001                                                   | 0.5 [0.41-0.62], p<0.001        | 0.62 [0.44-0.87], p=0.006     |
| CML                                 | 0.73 [0.59-0.9], p=0.003                       | 0.78 [0.6-1], p=0.048           | 0.65 [0.45-0.94], p=0.021     | 0.72 [0.56-0.91], p=0.006                                                   | 0.77 [0.59-1], p=0.05           | 0.54 [0.31-0.94], p=0.028     |
| Lymphoma                            | R 1.08 [0.97-1.19], p=0.16                     | 1.19 [1.06-1.33], p=0.004       | 0.83 [0.68-1.02], p=0.08      | 1.1 [0.99-1.23], p=0.09                                                     | 1.19 [1.06-1.34], p=0.004       | 0.79 [0.61-1.04], p=0.09      |
| MDS/MPN                             | 0.76 [0.71-0.81], p<0.001                      | 0.75 [0.69-0.81], p<0.001       | 0.78 [0.69-0.89], p<0.001     | 0.74 [0.68-0.8], p<0.001                                                    | 0.73 [0.67-0.8], p<0.001        | 0.76 [0.65-0.9], p=0.001      |
| Plasma cell disorders               | 0.97 [0.86-1.09], p=0.56                       | 0.81 [0.7-0.94], p=0.007        | 1.29 [1.07-1.55], p=0.007     | 0.87 [0.76-0.99], p=0.036                                                   | 0.8 [0.69-0.94], p=0.006        | 1.07 [0.84-1.37], p=0.59      |
| Others                              | 1.06 [0.92-1.22], p=0.42                       | 1.02 [0.86-1.22], p=0.78        | 1.15 [0.89-1.49], p=0.28      | 1.06 [0.91-1.23], p=0.47                                                    | 1.03 [0.86-1.22], p=0.77        | 1.18 [0.87-1.61], p=0.3       |
| P-value after Cox Anova             | < 0.001                                        | < 0.001                         | < 0.001                       |                                                                             |                                 |                               |
| <b>Sex ref. female</b>              | 1                                              | 1                               | 1                             | 1                                                                           | 1                               | 1                             |
| male                                | 1.08 [1.03-1.14], p=0.004                      | 1.05 [0.98-1.12], p=0.17        | 1.16 [1.05-1.27], p=0.003     | 1.06 [1-1.12], p=0.06                                                       | 1.04 [0.97-1.11], p=0.23        | 1.11 [0.98-1.25], p=0.1       |

| Covariate                                   | Cox regression regarding overall survival (OS) |                                 |                               | Additive proportional hazards model regarding excess mortality <sup>†</sup> |                                 |                               |
|---------------------------------------------|------------------------------------------------|---------------------------------|-------------------------------|-----------------------------------------------------------------------------|---------------------------------|-------------------------------|
|                                             | Total FU*<br>HR [95%CI]                        | First year of FU*<br>HR [95%CI] | Years 1+ of FU*<br>HR [95%CI] | Total FU*<br>HR [95%CI]                                                     | First year of FU*<br>HR [95%CI] | Years 1+ of FU*<br>HR [95%CI] |
| <b>Comorbidity- ref. No</b>                 | 1                                              | 1                               | 1                             | 1                                                                           | 1                               | 1                             |
| Yes                                         | 1.16 [1.07-1.25], p<0.001                      | 1.18 [1.07-1.29], p<0.001       | 1.12 [0.99-1.26], p=0.07      | 1.16 [1.07-1.26], p<0.001                                                   | 1.2 [1.1-1.31], p<0.001         | 1.05 [0.89-1.24], p=0.54      |
| <b>TCI, ref. high</b>                       | 1                                              | 1                               | 1                             | 1                                                                           | 1                               | 1                             |
| Intermediate                                | 0.93 [0.77-1.12], p=0.44                       | 0.92 [0.72-1.16], p=0.47        | 0.95 [0.7-1.31], p=0.77       | 0.93 [0.68-1.27], p=0.63                                                    | 0.92 [0.66-1.27], p=0.59        | 0.97 [0.61-1.54], p=0.89      |
| Low                                         | 0.91 [0.75-1.1], p=0.32                        | 0.93 [0.73-1.18], p=0.53        | 0.87 [0.63-1.21], p=0.41      | 0.93 [0.68-1.27], p=0.63                                                    | 0.94 [0.68-1.31], p=0.71        | 0.89 [0.56-1.39], p=0.59      |
| P-value after Cox Anova                     | 0.55                                           | 0.77                            | 0.31                          |                                                                             |                                 |                               |
| <b>Karnofsky Pef. Index, ref. 90-100</b>    | 1                                              | 1                               | 1                             | 1                                                                           | 1                               | 1                             |
| 80                                          | 1.27 [1.19-1.35], p<0.001                      | 1.31 [1.22-1.42], p<0.001       | 1.17 [1.04-1.32], p=0.008     | 1.3 [1.21-1.39], p<0.001                                                    | 1.33 [1.23-1.44], p<0.001       | 1.2 [1.01-1.42], p=0.035      |
| <80                                         | 1.84 [1.68-2.02], p<0.001                      | 1.96 [1.75-2.18], p<0.001       | 1.53 [1.27-1.85], p<0.001     | 1.95 [1.77-2.15], p<0.001                                                   | 2.04 [1.82-2.3], p<0.001        | 1.56 [1.24-1.97], p<0.001     |
| P-value after Cox Anova                     | < 0.001                                        | < 0.001                         | < 0.001                       |                                                                             |                                 |                               |
| <b>CMV relation, ref. both IgG negative</b> | 1                                              | 1                               | 1                             | 1                                                                           | 1                               | 1                             |
| Both positive                               | 1.14 [1.07-1.22], p<0.001                      | 1.2 [1.11-1.31], p<0.001        | 1.03 [0.92-1.16], p=0.59      | 1.19 [1.1-1.28], p<0.001                                                    | 1.24 [1.13-1.36], p<0.001       | 1.04 [0.89-1.21], p=0.65      |



| Covariate                                 | Cox regression regarding overall survival (OS) |                                 |                               | Additive proportional hazards model regarding excess mortality <sup>†</sup> |                                 |                               |
|-------------------------------------------|------------------------------------------------|---------------------------------|-------------------------------|-----------------------------------------------------------------------------|---------------------------------|-------------------------------|
|                                           | Total FU*<br>HR [95%CI]                        | First year of FU*<br>HR [95%CI] | Years 1+ of FU*<br>HR [95%CI] | Total FU*<br>HR [95%CI]                                                     | First year of FU*<br>HR [95%CI] | Years 1+ of FU*<br>HR [95%CI] |
| Patient neg. donor pos.                   | 1.09 [0.98-1.22], p=0.1                        | 1.12 [0.98-1.29], p=0.09        | 1.04 [0.86-1.25], p=0.71      | 1.09 [0.97-1.24], p=0.16                                                    | 1.12 [0.97-1.29], p=0.14        | 1.01 [0.8-1.29], p=0.91       |
| Patient pos. donor neg.                   | 1.23 [1.13-1.33], p<0.001                      | 1.31 [1.19-1.43], p<0.001       | 1.07 [0.93-1.23], p=0.38      | 1.3 [1.19-1.42], p<0.001                                                    | 1.35 [1.22-1.5], p<0.001        | 1.14 [0.96-1.36], p=0.13      |
| P-value after Cox Anova                   | < 0.001                                        | < 0.001                         | 0.85                          |                                                                             |                                 |                               |
| <b>Donor Type, ref. related</b>           | 1                                              | 1                               | 1                             | 1                                                                           | 1                               | 1                             |
| Unrelated                                 | 1.11 [1.03-1.19], p=0.007                      | 1.15 [1.05-1.26], p=0.002       | 1.04 [0.91-1.18], p=0.58      | 1.14 [1.04-1.25], p=0.005                                                   | 1.16 [1.05-1.28], p=0.003       | 1.07 [0.9-1.27], p=0.44       |
| <b>Donor Type, HLA-match, ref. match</b>  | 1                                              | 1                               | 1                             | 1                                                                           | 1                               | 1                             |
| Unmatched                                 | 1.33 [1.19-1.49], p<0.001                      | 1.38 [1.21-1.57], p<0.001       | 1.21 [1-1.46], p=0.05         | 1.37 [1.13-1.67], p=0.007                                                   | 1.4 [1.13-1.74], p=0.008        | 1.27 [0.99-1.62], p=0.06      |
| <b>TBI part of conditioning, ref. No</b>  | 1                                              | 1                               | 1                             | 1                                                                           | 1                               | 1                             |
| Yes                                       | 1.14 [1.06-1.22], p<0.001                      | 1.13 [1.03-1.23], p=0.008       | 1.15 [1.01-1.32], p=0.042     | 1.14 [1.05-1.23], p=0.001                                                   | 1.14 [1.04-1.24], p=0.005       | 1.14 [0.96-1.35], p=0.13      |
| <b>Donor Age, ref. higher than median</b> | 1                                              | 1                               | 1                             | 1                                                                           | 1                               | 1                             |
| Lower                                     | 0.86 [0.79-0.93], p<0.001                      | 0.86 [0.78-0.95], p=0.004       | 0.84 [0.73-0.97], p=0.018     | 0.85 [0.74-0.99], p=0.036                                                   | 0.86 [0.76-0.99], p=0.036       | 0.82 [0.64-1.05], p=0.1       |
| <b>Period, ref. 1998-2008</b>             | 1                                              | 1                               | 1                             | 1                                                                           | 1                               | 1                             |
| 2009-2018                                 | 0.95 [0.89-1.01], p=0.09                       | 0.9 [0.84-0.97], p=0.009        | 1.04 [0.93-1.16], p=0.51      | 0.92 [0.85-0.99], p=0.021                                                   | 0.9 [0.83-0.97], p=0.008        | 1 [0.86-1.15], p=0.96         |

| Covariate                                     | Cox regression regarding overall survival (OS) |                                 |                               | Additive proportional hazards model regarding excess mortality <sup>†</sup> |                                 |                               |
|-----------------------------------------------|------------------------------------------------|---------------------------------|-------------------------------|-----------------------------------------------------------------------------|---------------------------------|-------------------------------|
|                                               | Total FU*<br>HR [95%CI]                        | First year of FU*<br>HR [95%CI] | Years 1+ of FU*<br>HR [95%CI] | Total FU*<br>HR [95%CI]                                                     | First year of FU*<br>HR [95%CI] | Years 1+ of FU*<br>HR [95%CI] |
| Stem cell source, <b>ref. Bone marrow</b>     | 1                                              | 1                               | 1                             | 1                                                                           | 1                               | 1                             |
| Peripheral Blood                              | 0.91 [0.81-1.02], p=0.11                       | 0.95 [0.83-1.09], p=0.45        | 0.82 [0.68-1], p=0.05         | 0.92 [0.81-1.05], p=0.23                                                    | 0.95 [0.82-1.11], p=0.52        | 0.82 [0.64-1.05], p=0.11      |
| Remission state at HSCT,<br><b>ref. no CR</b> | 1                                              | 1                               | 1                             | 1                                                                           | 1                               | 1                             |
| Complete remission                            | 0.71 [0.66-0.75], p<0.001                      | 0.66 [0.61-0.72], p<0.001       | 0.82 [0.73-0.92], p<0.001     | 0.67 [0.63-0.72], p<0.001                                                   | 0.65 [0.6-0.7], p<0.001         | 0.76 [0.66-0.88], p<0.001     |
| Follow-up year 0-1, Hazard                    | NA                                             | NA                              | NA                            | 0.53 [0.35-0.81], p=0.006                                                   | 0.49 [0.32-0.76], p=0.          | Not evaluated                 |
| Follow-up year 1-2, Hazard                    | NA                                             | NA                              | NA                            | 0.17 [0.11-0.26], p<0.001                                                   | NA                              | 0.23 [0.13-0.4], p<0.001      |
| Follow-up year 2-3, Hazard                    | NA                                             | NA                              | NA                            | 0.11 [0.07-0.16], p<0.001                                                   | NA                              | 0.14 [0.08-0.25], p<0.001     |
| Follow-up year 3-4, Hazard                    | NA                                             | NA                              | NA                            | 0.07 [0.05-0.11], p<0.001                                                   | NA                              | 0.09 [0.05-0.17], p<0.001     |
| <b>Likelihood Ratio Test</b>                  | p<0.001                                        | p < 0.001                       | p < 0.001                     | NA                                                                          | NA                              | NA                            |
| * See Appendix for model reference            |                                                |                                 |                               |                                                                             |                                 |                               |

**Supplemental table 5. Regression analyses – full model.** Values obtained from a multivariable Cox regression model are depicted overall and separately for the first year and subsequent years of follow-up. Likewise, a Cox model was fitted for excess hazard only. An overall p-value of a likelihood ratio test was added. FU follow up.

## 5. Addressing possible bias throughout the manuscript – patients transplanted after 2005

Supplemental table 6 - Detailed outcome data – patients transplanted after 2005 and with a center-follow up of 50%, n = 7739

|            | Overall survival<br>p<0.001* |                          | Relapse-free survival<br>p<0.001* |                          | Graft-versus-Host-relapse-free survival<br>p<0.001* |                          | NRM<br>p<0.001*          |                          | Relapse<br>p=0.78*       |                       | Sev. cGvHD<br>p=0.47* |                       | Sev. aGvHD<br>P=0.96* |                      |
|------------|------------------------------|--------------------------|-----------------------------------|--------------------------|-----------------------------------------------------|--------------------------|--------------------------|--------------------------|--------------------------|-----------------------|-----------------------|-----------------------|-----------------------|----------------------|
|            | 60-69                        | 70-79                    | 60-69                             | 70-79                    | 60-69                                               | 70-79                    | 60-69                    | 70-79                    | 60-69                    | 70-79                 | 60-69                 | 70-79                 | 60-69                 | 70-79                |
| Median     | 1.9<br>[95CI,<br>1.7-2.1]    | 1.1 [1-<br>1.3]          | 1.1 [1-<br>1.2]                   | 0.8<br>[0.7-<br>0.9]     | 0.6 [0.5-<br>0.6]                                   | 0.5 [0.4-<br>0.5]        |                          |                          |                          |                       |                       |                       |                       |                      |
| Day<br>100 |                              |                          |                                   |                          |                                                     |                          |                          |                          |                          |                       |                       |                       | 11.4% [10.7-<br>12.2] | 11.2% [9.5-<br>13.1] |
| 1 year     | 58.7%<br>[57.5-<br>60.0]     | 51.7%<br>[48.9-<br>54.7] | 51.2%<br>[49.9-<br>52.4]          | 45.6%<br>[42.9-<br>48.6] | 40.3%<br>[39.1-<br>41.5]                            | 33.8%<br>[31.2-<br>36.6] | 28.6%<br>[27.5-<br>29.7] | 33.8%<br>[31.2-<br>36.6] | 20.2%<br>[19.3-<br>21.3] | 20.5% [18.3-<br>22.9] | 12.8% [11.9-<br>13.6] | 14.5% [12.6-<br>16.6] |                       |                      |

|                          | Overall survival<br>p<0.001* |                      | Relapse-free survival<br>p<0.001* |                      | Graft-versus-Host-relapse-free survival<br>p<0.001* |                      | NRM<br>p<0.001*      |                      | Relapse<br>p=0.78*   |                   | Sev. cGvHD<br>p=0.47* |                   | Sev. aGvHD<br>P=0.96* |       |
|--------------------------|------------------------------|----------------------|-----------------------------------|----------------------|-----------------------------------------------------|----------------------|----------------------|----------------------|----------------------|-------------------|-----------------------|-------------------|-----------------------|-------|
|                          | 60-69                        | 70-79                | 60-69                             | 70-79                | 60-69                                               | 70-79                | 60-69                | 70-79                | 60-69                | 70-79             | 60-69                 | 70-79             | 60-69                 | 70-79 |
| 2 years                  | 49.1%<br>[47.9-50.4]         | 41.6%<br>[38.8-44.5] | 42.0%<br>[40.8-43.3]              | 37.2%<br>[34.4-40.1] | 31.8%<br>[30.6-33.0]                                | 26.7%<br>[24.3-29.4] | 32.6%<br>[31.5-33.8] | 38.3%<br>[35.5-41.1] | 25.4%<br>[24.3-26.5] | 24.5% [22.1-27.1] | 15.1% [14.2-16.0]     | 16.6% [14.5-18.8] |                       |       |
| 3 years                  | 43.4%<br>[42.1-44.7]         | 36.9%<br>[34.1-39.9] | 36.9%<br>[35.7-38.2]              | 32.9%<br>[30.2-35.8] | 27.6%<br>[26.5-28.8]                                | 23.5%<br>[21.1-26.2] | 35.0%<br>[33.8-36.2] | 40.7%<br>[37.8-43.6] | 28.1%<br>[26.9-29.2] | 26.4% [23.9-29.0] | 16.1% [15.2-17.0]     | 17.2% [15.0-19.4] |                       |       |
| 4 years                  | 39.8%<br>[38.5-41.1]         | 32.6%<br>[29.8-35.7] | 33.6%<br>[32.4-34.9]              | 28.6%<br>[26.0-31.6] | 24.9%<br>[23.7-26.0]                                | 20.1%<br>[17.8-22.8] | 36.5%<br>[35.3-37.8] | 43.1%<br>[40.1-46.1] | 29.8%<br>[28.6-31.0] | 28.2% [25.6-31.0] | 16.9% [16.0-17.9]     | 18.0% [15.8-20.3] |                       |       |
| + logrank, * Gray's test |                              |                      |                                   |                      |                                                     |                      |                      |                      |                      |                   |                       |                   |                       |       |

Detailed survival data. OS overall survival, RFS relapse-free survival, GRFS Graft-versus-Host-relapse-free-survival, NRM non-relapse mortality, relapse, severe cGvHD and severe aGvHD

Supplemental table 7. Regression analyses – all patients transplanted after 2005 and with a center-follow up of 50%, n = 7739

| Covariate                    | Cox regression regarding overall survival (OS) |                                 |                               | Additive proportional hazards model regarding excess mortality <sup>†</sup> |                                 |                               |
|------------------------------|------------------------------------------------|---------------------------------|-------------------------------|-----------------------------------------------------------------------------|---------------------------------|-------------------------------|
|                              | Total FU*<br>HR [95%CI]                        | First year of FU*<br>HR [95%CI] | Years 1+ of FU*<br>HR [95%CI] | Total FU*<br>HR [95%CI]                                                     | First year of FU*<br>HR [95%CI] | Years 1+ of FU*<br>HR [95%CI] |
| Age group ref. 60-69         | 1                                              | 1                               | 1                             | 1                                                                           | 1                               | 1                             |
| 70-79                        | 1.21 [1.12-1.31], p<0.001                      | 1.22 [1.11-1.34], p<0.001       | 1.2 [1.03-1.38], p=0.016      | 1.18 [1.08-1.28], p<0.001                                                   | 1.21 [1.1-1.34], p<0.001        | 1.06 [0.88-1.28], p=0.56      |
| Disease, ref. acute leukemia | 1                                              | 1                               | 1                             | 1                                                                           | 1                               | 1                             |
| CLL                          | 0.61 [0.51-0.74], p<0.001                      | 0.56 [0.44-0.71], p<0.001       | 0.73 [0.55-0.97], p=0.032     | 0.55 [0.44-0.68], p<0.001                                                   | 0.54 [0.42-0.69], p<0.001       | 0.58 [0.39-0.87], p=0.009     |
| CML                          | 0.78 [0.59-1.04], p=0.09                       | 0.82 [0.58-1.15], p=0.24        | 0.71 [0.42-1.19], p=0.19      | 0.75 [0.55-1.03], p=0.08                                                    | 0.79 [0.56-1.12], p=0.19        | 0.64 [0.31-1.3], p=0.21       |
| Lymphoma                     | 1.11 [0.99-1.24], p=0.07                       | 1.21 [1.07-1.38], p=0.003       | 0.87 [0.7-1.09], p=0.23       | 1.14 [1.01-1.28], p=0.038                                                   | 1.23 [1.07-1.4], p=0.003        | 0.84 [0.63-1.11], p=0.23      |
| MDS/MPN                      | 0.76 [0.7-0.82], p<0.001                       | 0.76 [0.69-0.83], p<0.001       | 0.78 [0.68-0.9], p<0.001      | 0.74 [0.68-0.81], p<0.001                                                   | 0.74 [0.67-0.81], p<0.001       | 0.77 [0.65-0.92], p=0.004     |
| Plasma cell disorders        | 0.98 [0.85-1.12], p=0.75                       | 0.82 [0.69-0.99], p=0.036       | 1.3 [1.05-1.63], p=0.018      | 0.87 [0.74-1.02], p=0.09                                                    | 0.81 [0.68-0.98], p=0.031       | 1.04 [0.78-1.4], p=0.77       |
| Others                       | 1.06 [0.9-1.24], p=0.5                         | 0.99 [0.81-1.21], p=0.93        | 1.23 [0.93-1.62], p=0.15      | 1.04 [0.87-1.23], p=0.68                                                    | 0.99 [0.81-1.21], p=0.89        | 1.23 [0.88-1.72], p=0.22      |
| Sex ref. female              | 1                                              | 1                               | 1                             | 1                                                                           | 1                               | 1                             |
| male                         | 1.08 [1.01-1.14], p=0.015                      | 1.04 [0.97-1.12], p=0.31        | 1.15 [1.04-1.28], p=0.009     | 1.06 [0.99-1.13], p=0.11                                                    | 1.03 [0.96-1.11], p=0.45        | 1.14 [1-1.3], p=0.06          |
| Comorbidity- ref. No         | 1                                              | 1                               | 1                             | 1                                                                           | 1                               | 1                             |

|                                             | Cox regression regarding overall survival (OS) |                                 |                               | Additive proportional hazards model regarding excess mortality <sup>†</sup> |                                 |                               |
|---------------------------------------------|------------------------------------------------|---------------------------------|-------------------------------|-----------------------------------------------------------------------------|---------------------------------|-------------------------------|
|                                             | Total FU*<br>HR [95%CI]                        | First year of FU*<br>HR [95%CI] | Years 1+ of FU*<br>HR [95%CI] | Total FU*<br>HR [95%CI]                                                     | First year of FU*<br>HR [95%CI] | Years 1+ of FU*<br>HR [95%CI] |
| Covariate                                   |                                                |                                 |                               |                                                                             |                                 |                               |
| Yes                                         | 1.16 [1.07-1.26], p<0.001                      | 1.2 [1.09-1.32], p<0.001        | 1.08 [0.95-1.23], p=0.25      | 1.18 [1.07-1.31], p=0.002                                                   | 1.21 [1.07-1.37], p=0.004       | 1.08 [0.92-1.26], p=0.33      |
| <b>TCI, ref. high</b>                       | 1                                              | 1                               | 1                             | 1                                                                           | 1                               | 1                             |
| Intermediate                                | 0.97 [0.79-1.19], p=0.76                       | 0.99 [0.76-1.28], p=0.91        | 0.94 [0.67-1.32], p=0.72      | 0.95 [0.76-1.19], p=0.65                                                    | 0.95 [0.71-1.27], p=0.71        | 0.95 [0.61-1.49], p=0.83      |
| Low                                         | 0.93 [0.75-1.16], p=0.54                       | 0.97 [0.74-1.28], p=0.84        | 0.87 [0.61-1.23], p=0.42      | 0.93 [0.73-1.19], p=0.58                                                    | 0.95 [0.68-1.32], p=0.75        | 0.88 [0.55-1.41], p=0.59      |
| <b>Karnofsky Perf. Index, ref. 90-100</b>   | 1                                              | 1                               | 1                             | 1                                                                           | 1                               | 1                             |
| 80                                          | 1.25 [1.17-1.34], p<0.001                      | 1.3 [1.19-1.41], p<0.001        | 1.17 [1.03-1.32], p=0.013     | 1.29 [1.19-1.4], p<0.001                                                    | 1.32 [1.2-1.45], p<0.001        | 1.19 [1.02-1.39], p=0.03      |
| <80                                         | 1.83 [1.66-2.03], p<0.001                      | 1.91 [1.7-2.15], p<0.001        | 1.61 [1.31-1.98], p<0.001     | 1.91 [1.71-2.12], p<0.001                                                   | 1.99 [1.77-2.24], p<0.001       | 1.58 [1.19-2.1], p=0.002      |
| <b>CMV relation, ref. both IgG negative</b> | 1                                              | 1                               | 1                             | 1                                                                           | 1                               | 1                             |
| Both positive                               | 1.15 [1.07-1.24], p<0.001                      | 1.2 [1.1-1.32], p<0.001         | 1.05 [0.93-1.2], p=0.43       | 1.18 [1.09-1.28], p<0.001                                                   | 1.22 [1.11-1.34], p<0.001       | 1.07 [0.91-1.26], p=0.4       |
| Patient neg. donor pos.                     | 1.12 [0.99-1.26], p=0.07                       | 1.13 [0.97-1.3], p=0.11         | 1.09 [0.89-1.33], p=0.39      | 1.12 [0.98-1.27], p=0.09                                                    | 1.13 [0.97-1.31], p=0.11        | 1.09 [0.85-1.41], p=0.49      |
| Patient pos. donor neg.                     | 1.25 [1.15-1.36], p<0.001                      | 1.31 [1.18-1.46], p<0.001       | 1.11 [0.95-1.29], p=0.18      | 1.31 [1.19-1.45], p<0.001                                                   | 1.35 [1.21-1.5], p<0.001        | 1.2 [0.99-1.46], p=0.07       |
| <b>Donor Type, ref. related</b>             | 1                                              | 1                               | 1                             | 1                                                                           | 1                               | 1                             |

|                                               | Cox regression regarding overall survival (OS) |                                 |                               | Additive proportional hazards model regarding excess mortality <sup>†</sup> |                                 |                               |
|-----------------------------------------------|------------------------------------------------|---------------------------------|-------------------------------|-----------------------------------------------------------------------------|---------------------------------|-------------------------------|
|                                               | Total FU*<br>HR [95%CI]                        | First year of FU*<br>HR [95%CI] | Years 1+ of FU*<br>HR [95%CI] | Total FU*<br>HR [95%CI]                                                     | First year of FU*<br>HR [95%CI] | Years 1+ of FU*<br>HR [95%CI] |
| Unrelated                                     | 1.16 [1.07-1.27], p<0.001                      | 1.2 [1.08-1.33], p<0.001        | 1.1 [0.95-1.28], p=0.2        | 1.2 [1.1-1.32], p<0.001                                                     | 1.21 [1.1-1.35], p<0.001        | 1.16 [0.98-1.39], p=0.09      |
| Donor Type, HLA-match, <b>ref. match</b>      | 1                                              | 1                               | 1                             | 1                                                                           | 1                               | 1                             |
| Unmatched                                     | 1.34 [1.16-1.54], p<0.001                      | 1.39 [1.19-1.63], p<0.001       | 1.22 [0.96-1.53], p=0.1       | 1.42 [1.21-1.67], p<0.001                                                   | 1.45 [1.21-1.74], p<0.001       | 1.29 [1.03-1.63], p=0.03      |
| TBI part of conditioning, <b>ref. No</b>      | 1                                              | 1                               | 1                             | 1                                                                           | 1                               | 1                             |
| Yes                                           | 1.14 [1.05-1.25], p=0.003                      | 1.15 [1.03-1.28], p=0.012       | 1.13 [0.96-1.33], p=0.16      | 1.13 [1.03-1.25], p=0.012                                                   | 1.14 [1.03-1.28], p=0.016       | 1.09 [0.89-1.34], p=0.4       |
| Donor Age, <b>ref. higher than median</b>     | 1                                              | 1                               | 1                             | 1                                                                           | 1                               | 1                             |
| Lower                                         | 0.83 [0.75-0.91], p<0.001                      | 0.83 [0.74-0.94], p=0.002       | 0.82 [0.69-0.96], p=0.014     | 0.8 [0.74-0.87], p<0.001                                                    | 0.82 [0.75-0.9], p<0.001        | 0.76 [0.65-0.88], p<0.001     |
| Period, <b>ref. 2006-2012</b>                 | 1                                              | 1                               | 1                             | 1                                                                           | 1                               | 1                             |
| 2013-2018                                     | 0.92 [0.87-0.98], p=0.009                      | 0.87 [0.81-0.94], p<0.001       | 1.03 [0.93-1.16], p=0.56      | 0.9 [0.85-0.97], p=0.003                                                    | 0.87 [0.81-0.94], p<0.001       | 1.03 [0.9-1.17], p=0.69       |
| Stem cell source, <b>ref. Bone marrow</b>     | 1                                              | 1                               | 1                             | 1                                                                           | 1                               | 1                             |
| Peripheral Blood                              | 0.9 [0.79-1.03], p=0.13                        | 0.94 [0.81-1.1], p=0.45         | 0.81 [0.65-1.02], p=0.07      | 0.94 [0.82-1.07], p=0.34                                                    | 0.96 [0.82-1.13], p=0.63        | 0.84 [0.64-1.11], p=0.22      |
| Remission state at HSCT,<br><b>ref. no CR</b> | 1                                              | 1                               | 1                             | 1                                                                           | 1                               | 1                             |

|                                    | Cox regression regarding overall survival (OS) |                                 |                               | Additive proportional hazards model regarding excess mortality <sup>†</sup> |                                 |                               |
|------------------------------------|------------------------------------------------|---------------------------------|-------------------------------|-----------------------------------------------------------------------------|---------------------------------|-------------------------------|
| Covariate                          | Total FU*<br>HR [95%CI]                        | First year of FU*<br>HR [95%CI] | Years 1+ of FU*<br>HR [95%CI] | Total FU*<br>HR [95%CI]                                                     | First year of FU*<br>HR [95%CI] | Years 1+ of FU*<br>HR [95%CI] |
| Complete remission                 | 0.73 [0.68-0.79], p<0.001                      | 0.68 [0.63-0.75], p<0.001       | 0.85 [0.75-0.96], p=0.012     | 0.69 [0.64-0.74], p<0.001                                                   | 0.67 [0.61-0.73], p<0.001       | 0.77 [0.66-0.91], p=0.002     |
| Follow-up year 0-1, Hazard         | NA                                             | NA                              | NA                            | 0.49 [0.36-0.65], p<0.001                                                   | 0.46 [0.31-0.67], p<0.001       | Not evaluated                 |
| Follow-up year 1-2, Hazard         | NA                                             | NA                              | NA                            | 0.16 [0.11-0.21], p<0.001                                                   | NA                              | 0.19 [0.11-0.34], p<0.001     |
| Follow-up year 2-3, Hazard         | NA                                             | NA                              | NA                            | 0.1 [0.07-0.14], p<0.001                                                    | NA                              | 0.12 [0.07-0.22], p<0.001     |
| Follow-up year 3-4, Hazard         | NA                                             | NA                              | NA                            | 0.07 [0.05-0.09], p<0.001                                                   | NA                              | 0.08 [0.05-0.15], p<0.001     |
| <b>Likelihood Ratio Test</b>       | p<0.001                                        | p < 0.001                       | p < 0.001                     | NA                                                                          | NA                              | NA                            |
| † See Appendix for model reference |                                                |                                 |                               |                                                                             |                                 |                               |

Values obtained from a multivariable Cox regression model are depicted overall and separately for the first year and subsequent years of follow-up. Likewise, a Cox model was fitted for excess hazard only. An overall p-value of a likelihood ratio test was added. FU follow up.

**N = 7739 patients transplanted after 2005 and with a center follow-up of 50%.**



Supplemental figure 8.1 – Multistates for all patients 60-69 transplanted after 2005, with a center follow-up of 50%, n = 7739

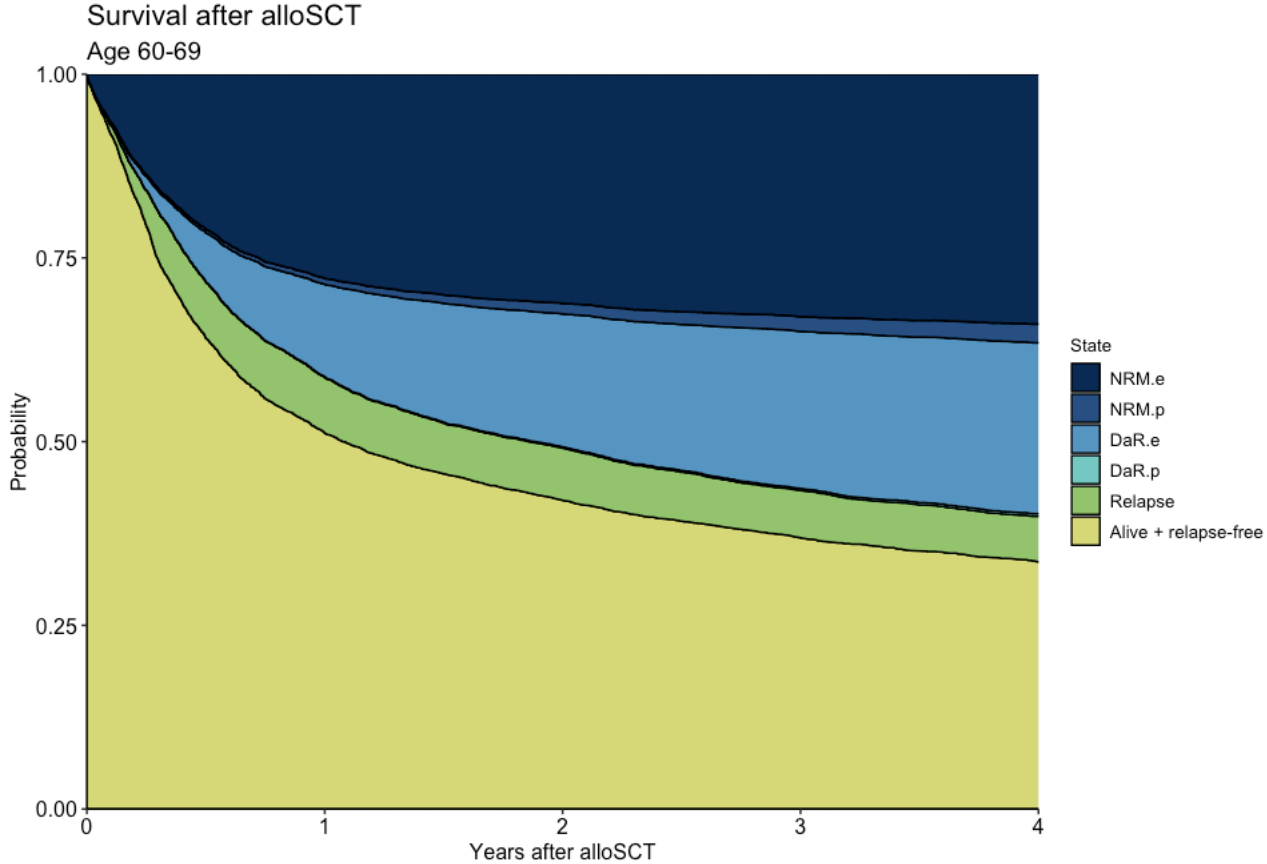

Supplemental figure 8.2 – Multistates for all patients 70-79 transplanted after 2005, with a center follow-up of 50%, n = 7739

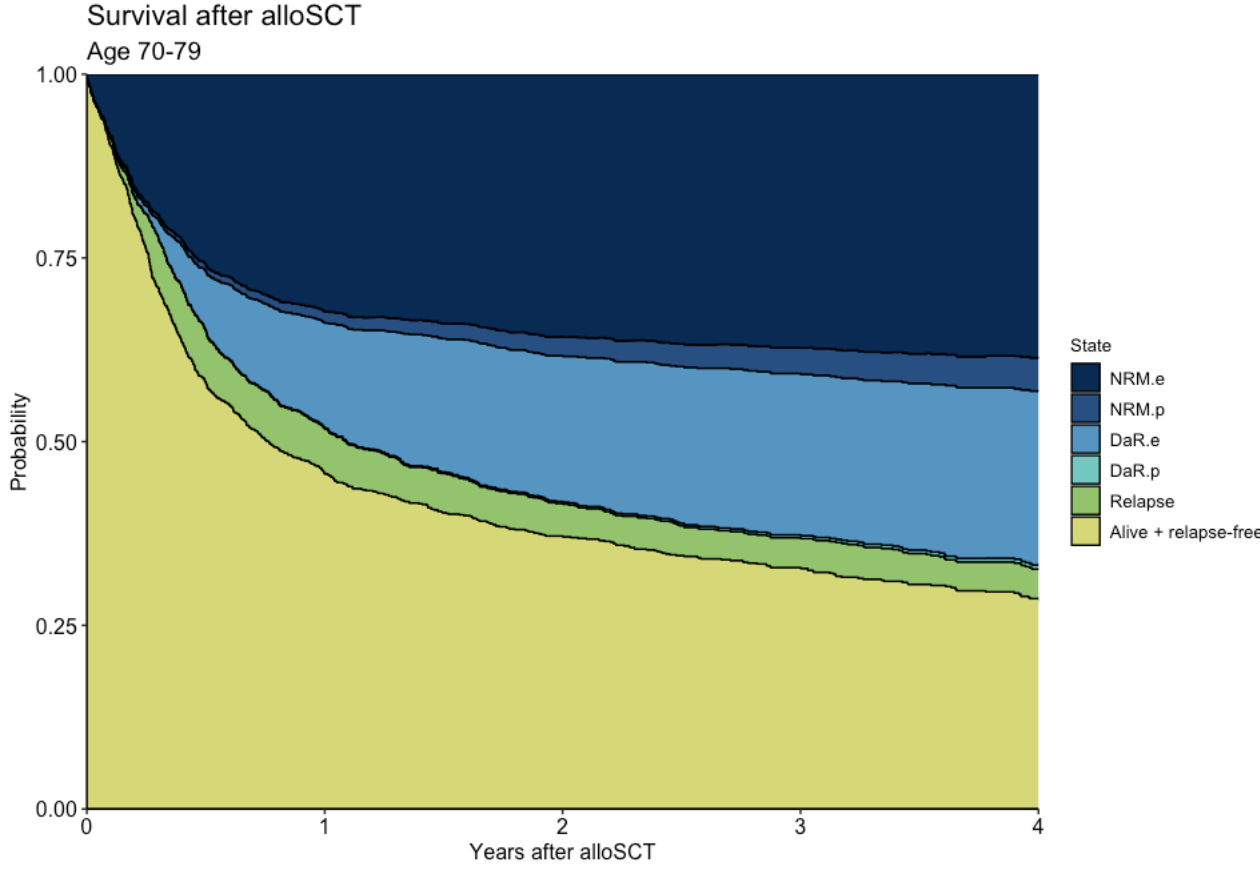

Supplement: 2023_283175_WELLER_SUPPL.pdf [file 2023_283175_WELLER_SUPPL.pdf]
